# Supplementary material for: Sc(OTf)3-mediated 1,3-dipolar cycloaddition–ring cleavage–rearrangement: a highly stereoselective access to Z-β-enaminonitriles
Source: Royal Society of Chemistry journal article supplement (doi:10.1039/c4ob01801j), 2014-10-22

## Supporting Information

### Sc(OTf)<sub>3</sub>-mediated 1,3-dipolar cycloaddition–ring cleavage–rearrangement: a highly stereoselective access to *Z*-β-enaminonitriles

Ying-chun Wang<sup>§,a,b</sup>, Yu-yang Xie<sup>§,a</sup>, Xian-chun Tan<sup>a</sup>, Heng-shan Wang<sup>a,\*</sup> and

Ying-ming Pan<sup>a,\*</sup>

<sup>a</sup> Key Laboratory for the Chemistry and Molecular Engineering of Medicinal Resources (Ministry of Education of China), School of Chemistry and Pharmaceutical Sciences of Guangxi Normal University, Guilin 541004, People's Republic of China

<sup>b</sup> College of Chemistry and Chemical Engineering, Jishou University, Jishou 416000, People's Republic of China

## Table of Contents

|                                                                                      |               |
|--------------------------------------------------------------------------------------|---------------|
| <b>1 General Information .....</b>                                                   | <b>S2</b>     |
| <b>2 General Experimental Procedure.....</b>                                         | <b>S2</b>     |
| <b>3 Copies of <sup>1</sup>H NMR and <sup>13</sup>C NMR Spectra of Products.....</b> | <b>S4-28</b>  |
| <b>4 Copies of HRMS Spectra of Products.....</b>                                     | <b>S29-35</b> |

---

\*Correspondence authors

Phone: (+86)-773-5846279; fax: (+86)-773-5803930;

E-mail: whengshan@163.com; panym2013@hotmail.com

## Experimental

**General methods and materials.** Proton nuclear magnetic resonance spectra ( $^1\text{H}$  NMR) and carbon nuclear magnetic resonance spectra ( $^{13}\text{C}$  NMR) were recorded at 500 MHz and 125 MHz, respectively, using  $\text{CDCl}_3$  as reference standard ( $\delta$  7.26 ppm) for  $^1\text{H}$  NMR and ( $\delta$  77.04 ppm) for  $^{13}\text{C}$  NMR. HRMS (ion trap) were recorded using APCI or ESI. Melting points are uncorrected. Column chromatography was performed on silica gel (300-400 mesh). Unless otherwise noted, all reagents were obtained commercially and used without further purification.

The  $\alpha$ ,  $\beta$ -unsaturated nitriles **1b**<sup>1</sup>, **1c**<sup>1</sup>, **1d**<sup>1</sup>, **1f**<sup>1</sup>, **1h**<sup>1</sup>, **1i**<sup>1</sup>, **1j**<sup>1</sup> and the azides **2b**<sup>2</sup>, **2c**<sup>2</sup>, **2d**<sup>3</sup>, **2e**<sup>3</sup>, **2f**<sup>4</sup>, **2g**<sup>4</sup>, **2h**<sup>2</sup>, **2i**<sup>5</sup>, **2j**<sup>2</sup>, **2k**<sup>3</sup>, **2l**<sup>5</sup>, **2m**<sup>6</sup>, **2n**<sup>2</sup>, **2o**<sup>3</sup> were synthesized as previously reported in the literature.

**General experimental procedure for synthesis of *Z*- $\beta$ -enaminonitriles **3**.** A mixture of  $\alpha$ ,  $\beta$ -unsaturated nitriles (1.0 equiv, 1 mmol), azide (1.2 equiv, 1.2 mmol),  $\text{Sc}(\text{OTf})_3$  (0.05 equiv, 0.05 mmol), and 2 mL of toluene was refluxed at 110 °C for 12 h. The progress of the reaction was monitored by thin-layer chromatography. The mixture was then cooled and evaporated under reduced pressure. The target product **3** was purified by column chromatography on silica gel using a mixture of ethyl acetate and petroleum ether.

*[CAUTION: Sufficient care has to be exercised while handling organic azides because of their explosive nature.]*

## References

- 1 S. A. Dibiase, B. A. Lipisko, A. Haag, R. A. Wolak and G. W. Gokel, *J. Org. Chem.*, 1979, **44**, 4641.
- 2 H. Zeng, Q. Tian and H. Shao, *Green Chem. Lett. Rev.*, 2011, **4**, 281.
- 3 T. Suzuki, Y. Ota, Y. Kasuya, M. Mutsuga, Y. Kawamura, H. Tsumoto, H. Nakagawa, M. G. Finn and N. Miyata, *Angew. Chem. Int. Ed.*, 2010, **49**, 6817.
- 4 X.-L. Wang, K. Wan and C.-H. Zhou, *Eur. J. Med. Chem.*, 2010, **45**, 4631
- 5 S. S. Kulkarni, X. Hu and R. Manetsch, *Chem. Commun.*, 2013, **49**, 1193.
- 6 W. Tang and D. Q. Shi, *Phosphorus, Sulfur Silicon Relat. Elem.*, 2011, **186**, 496.

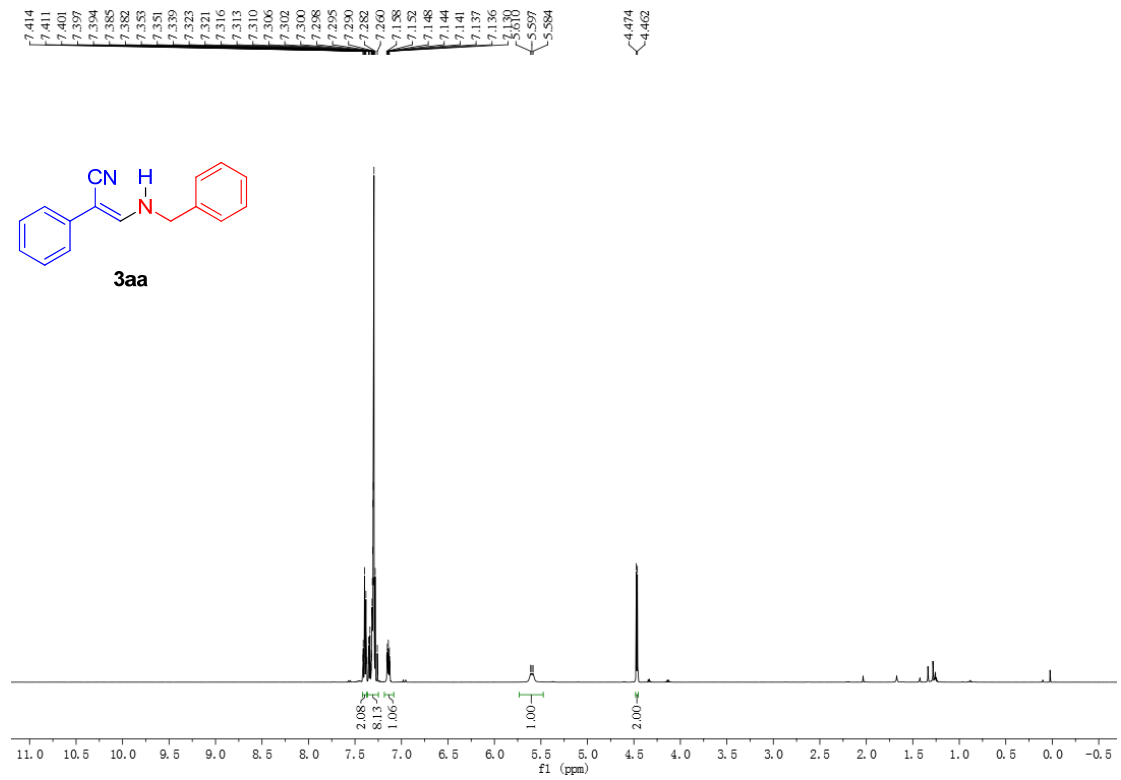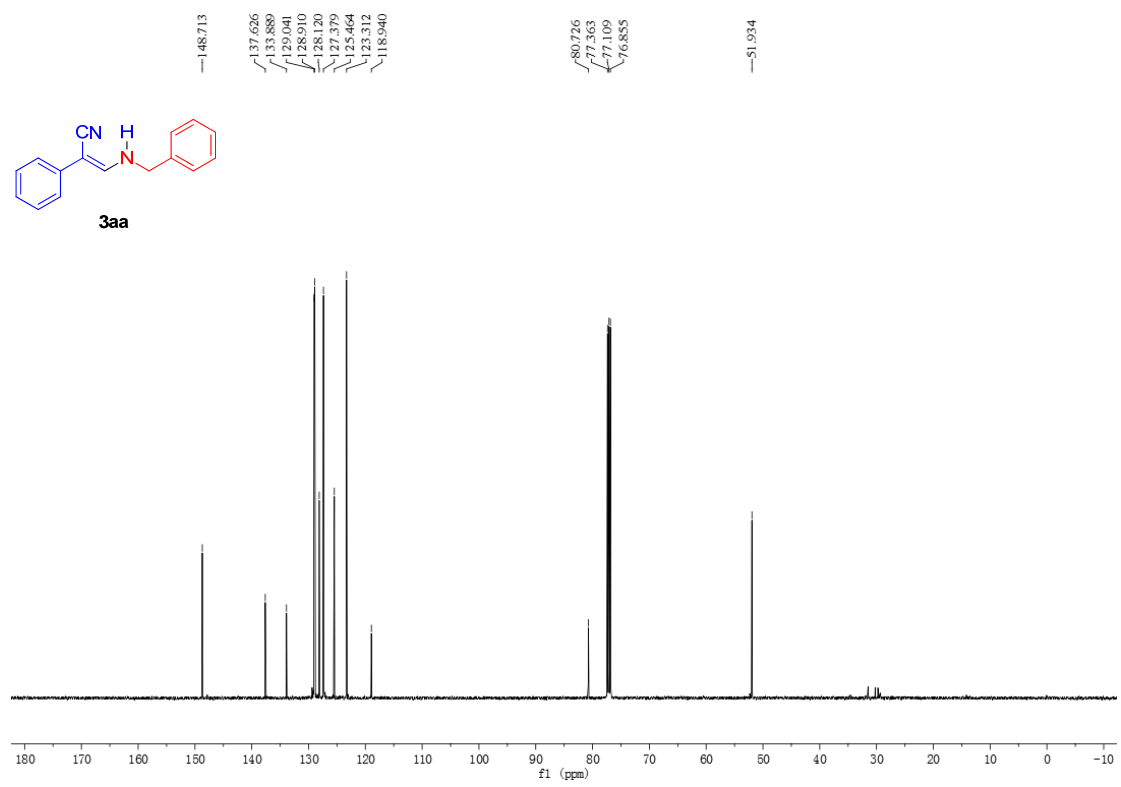

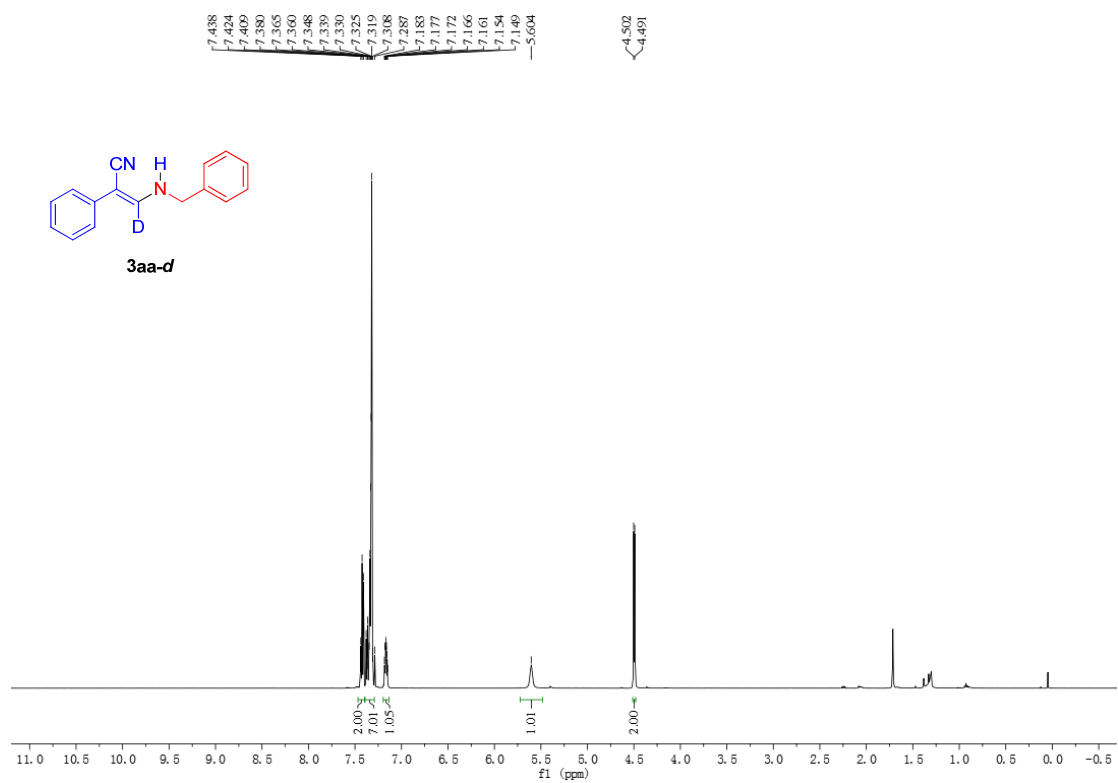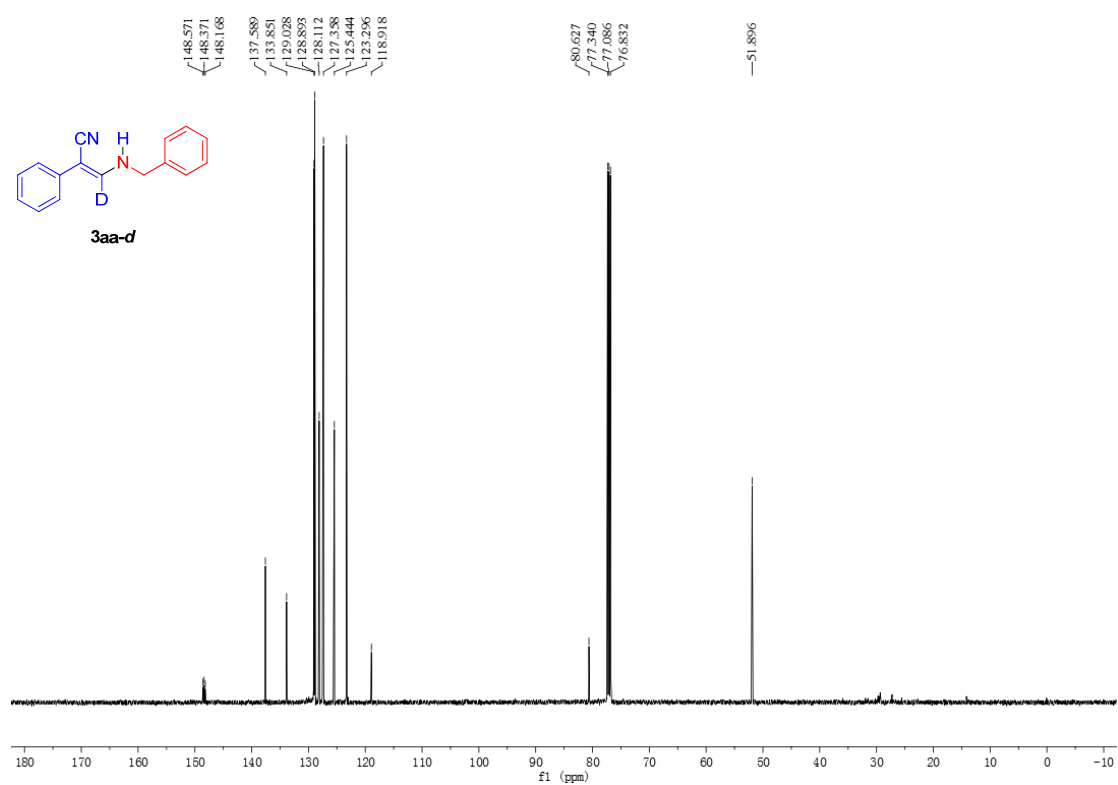

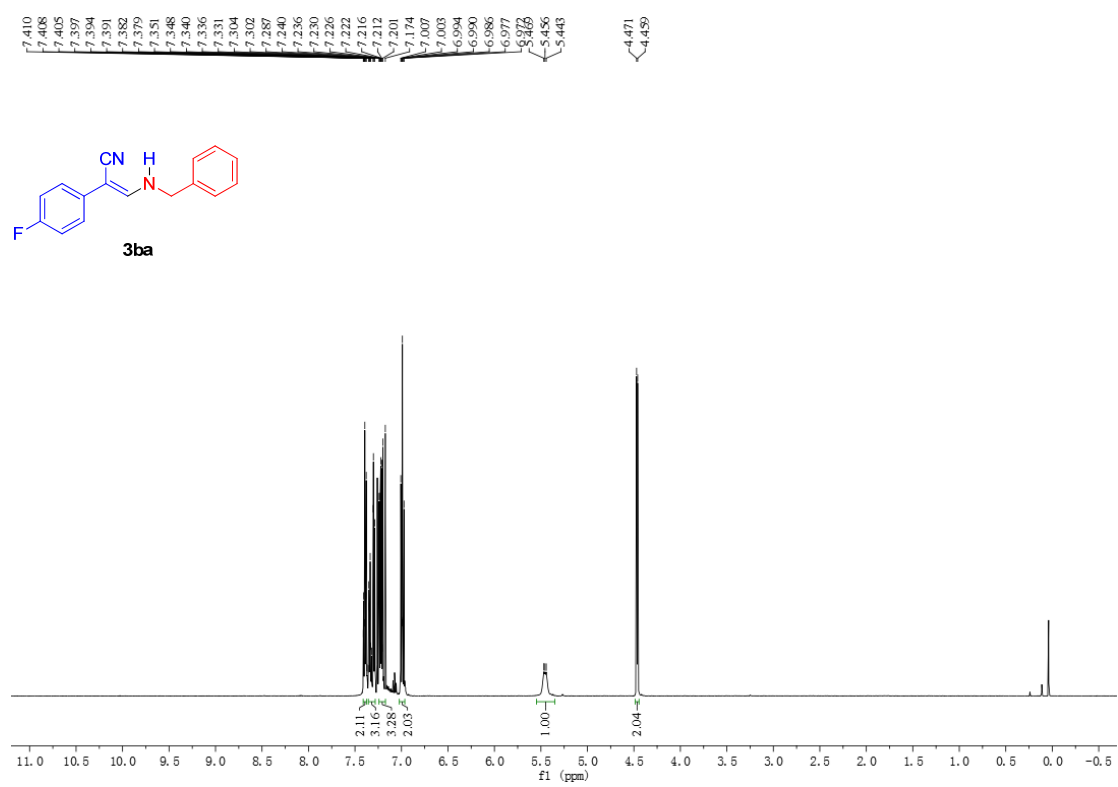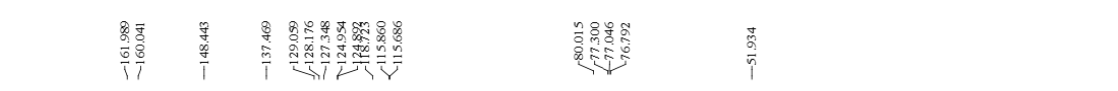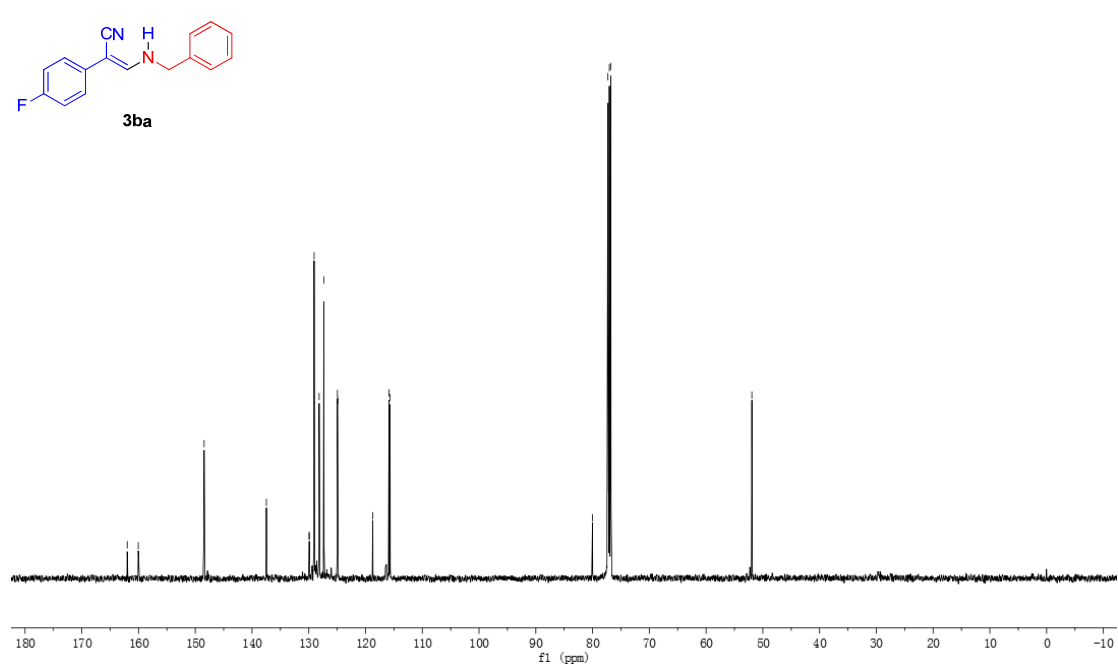

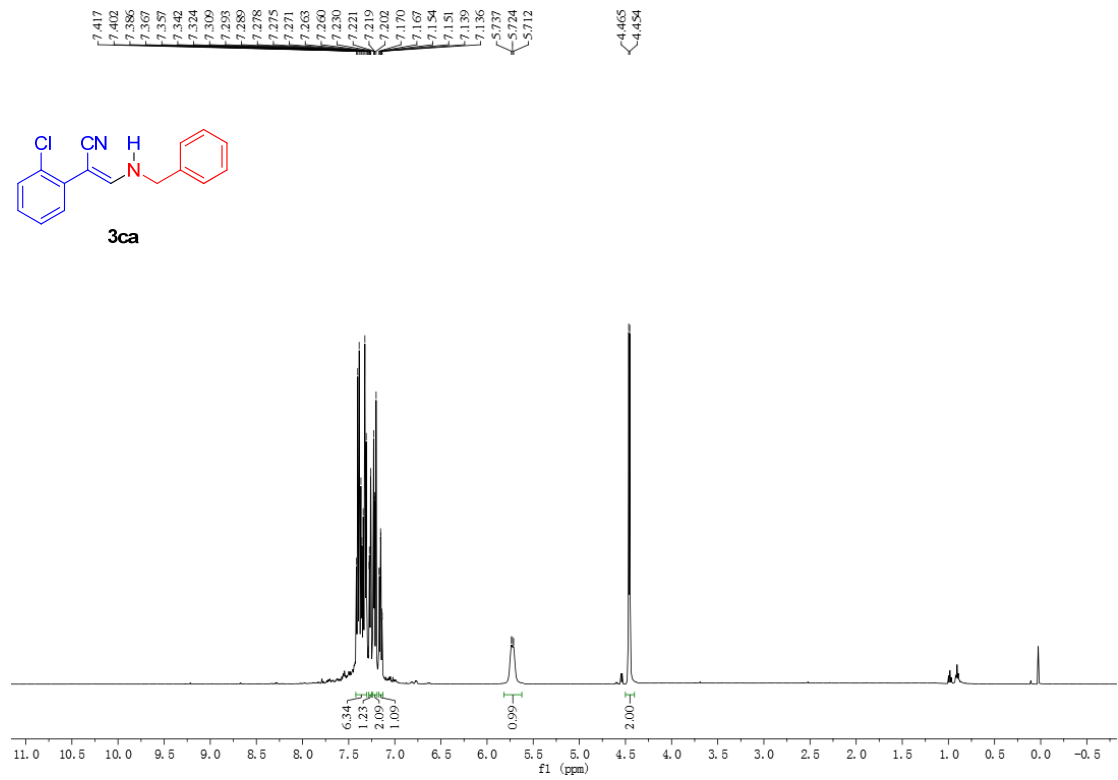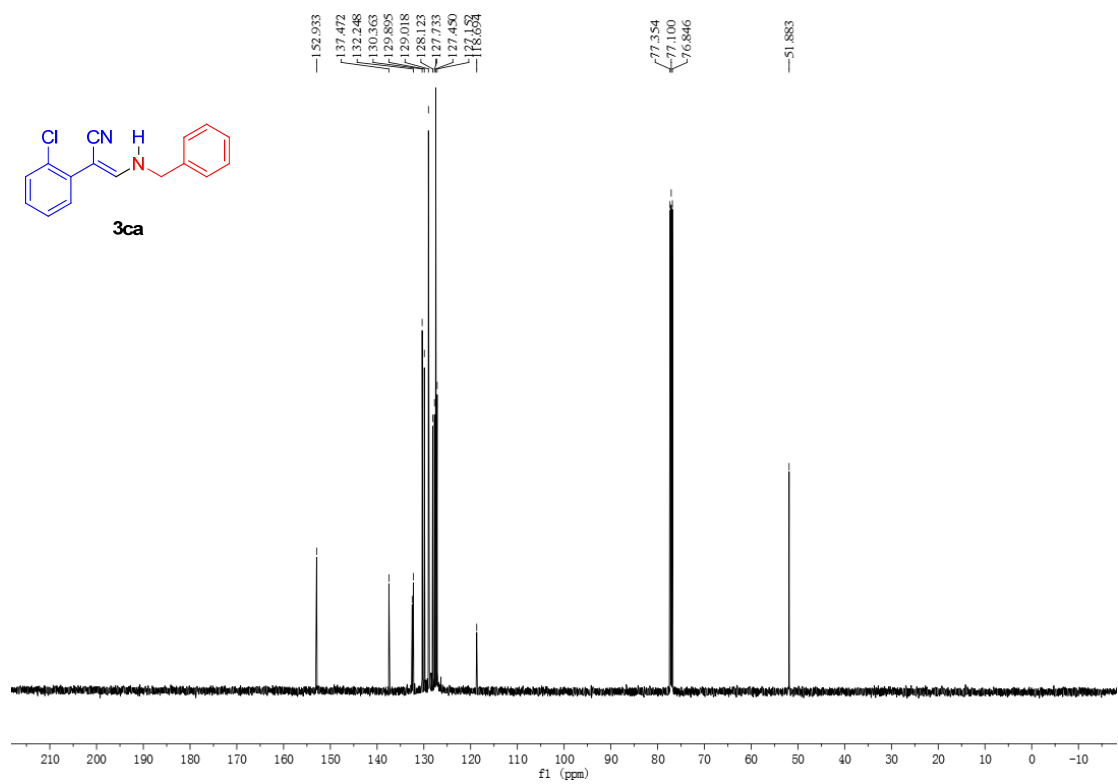

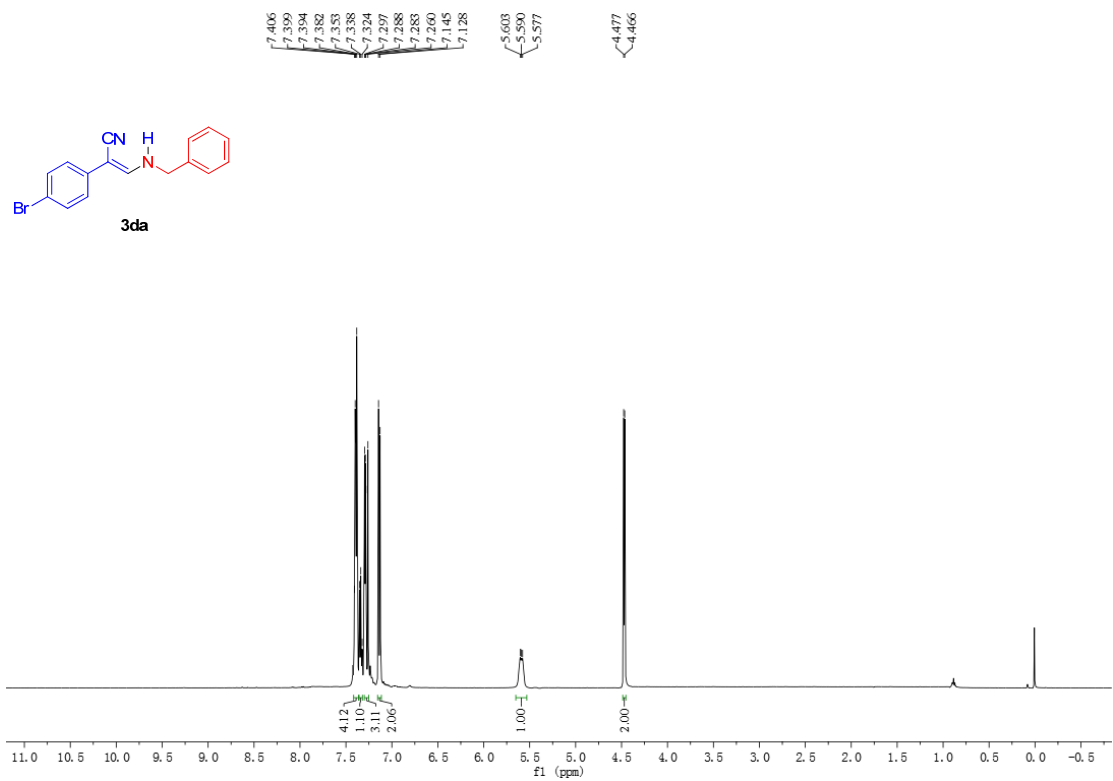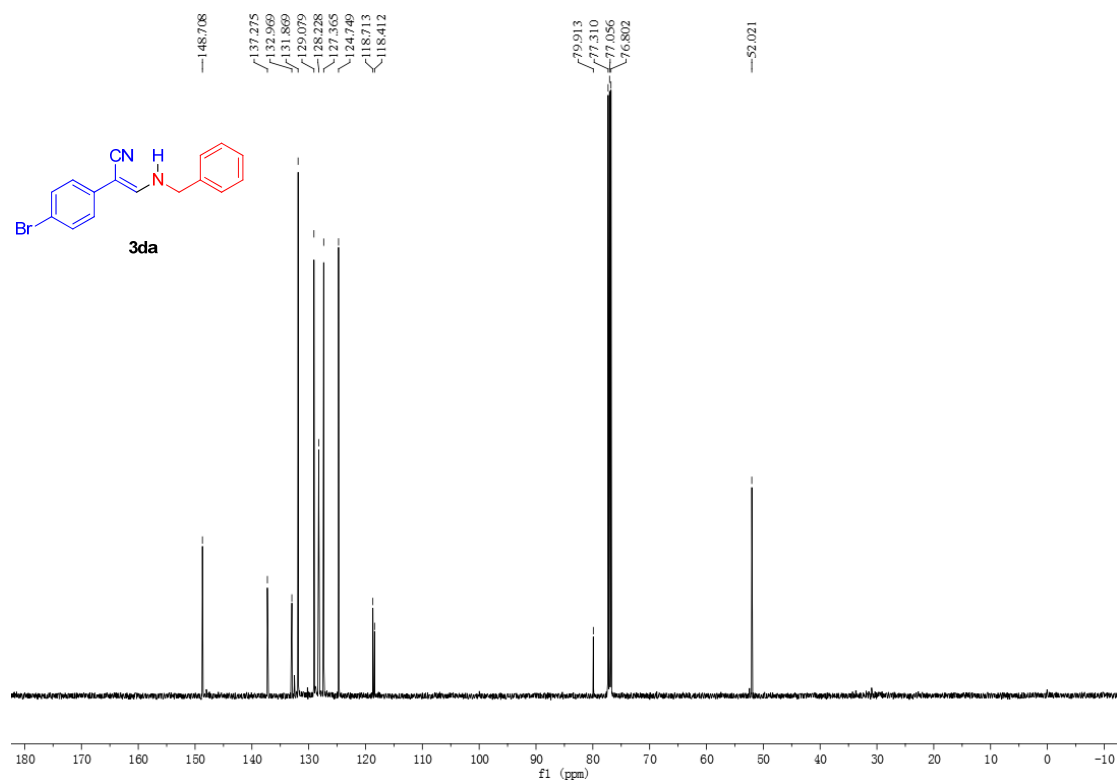



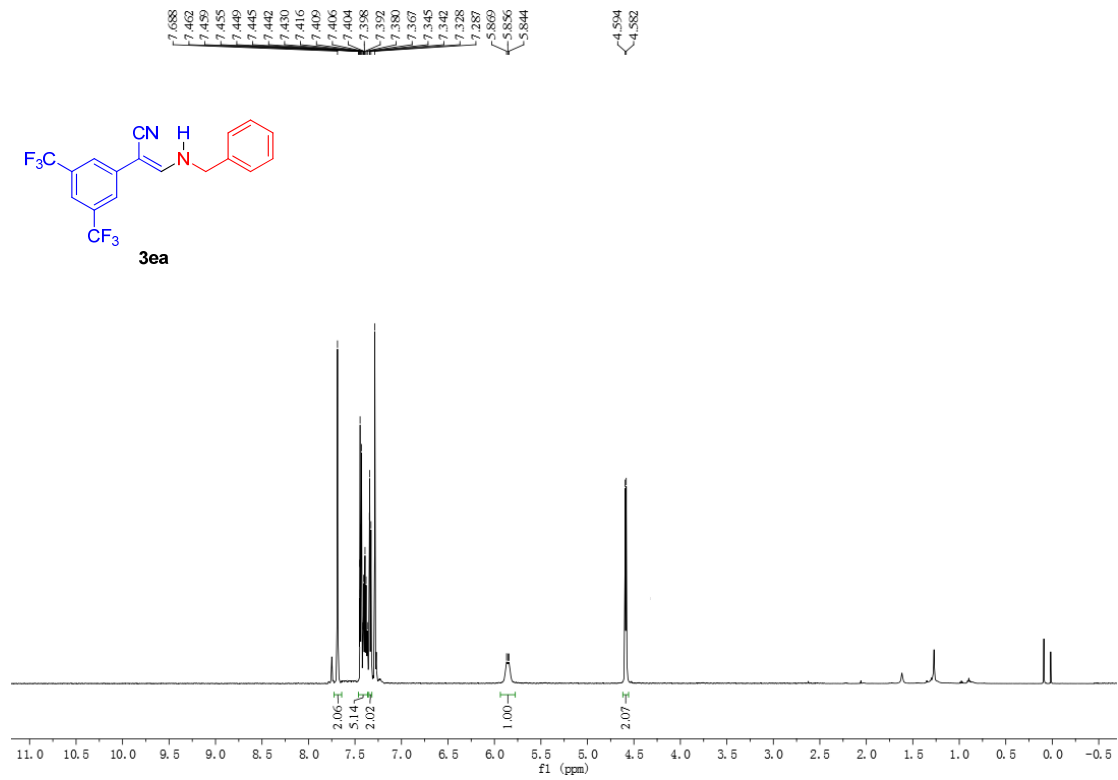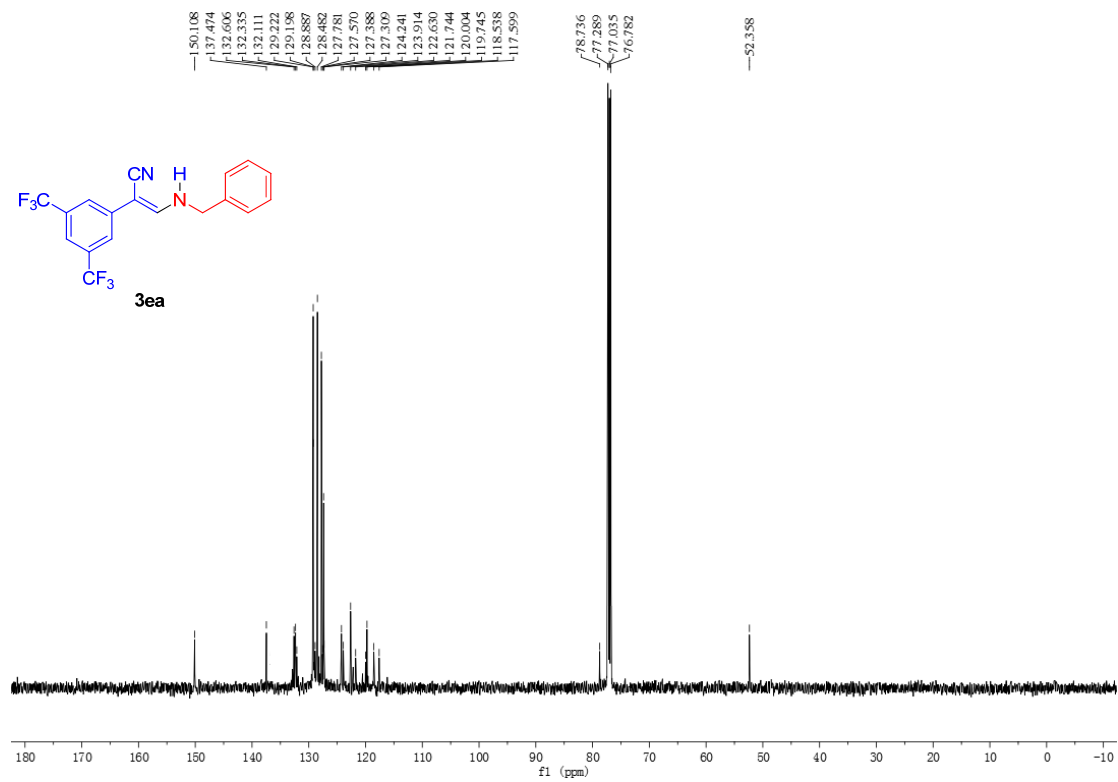

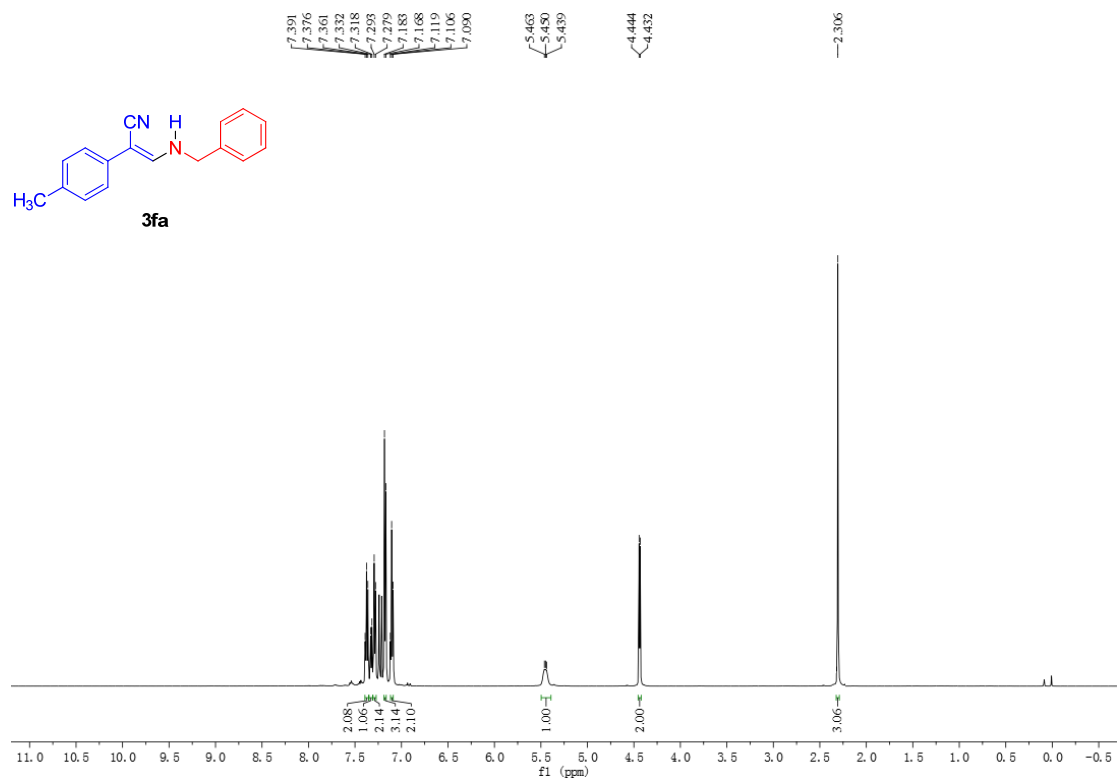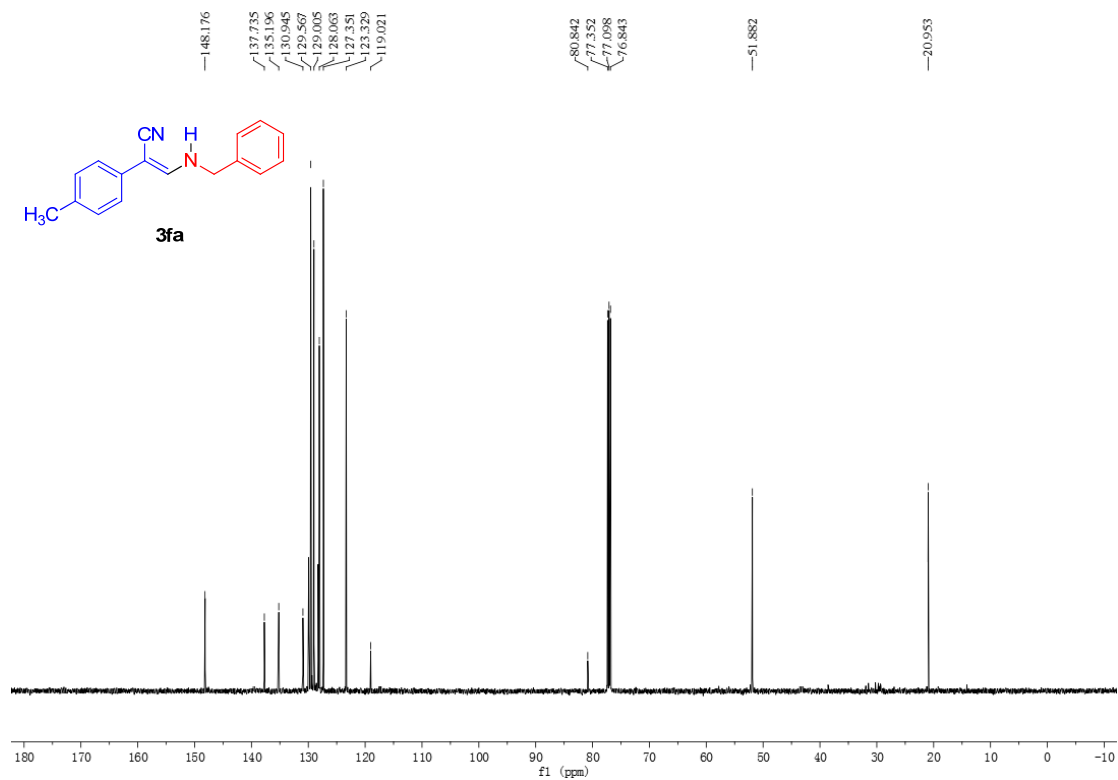

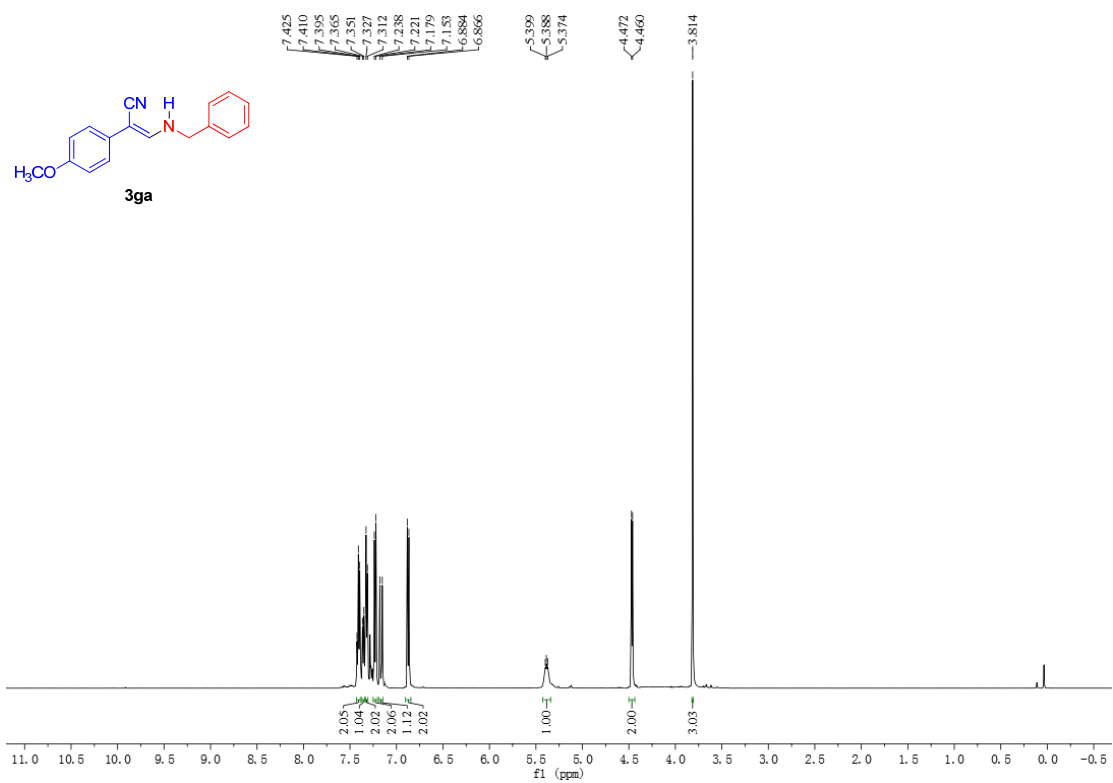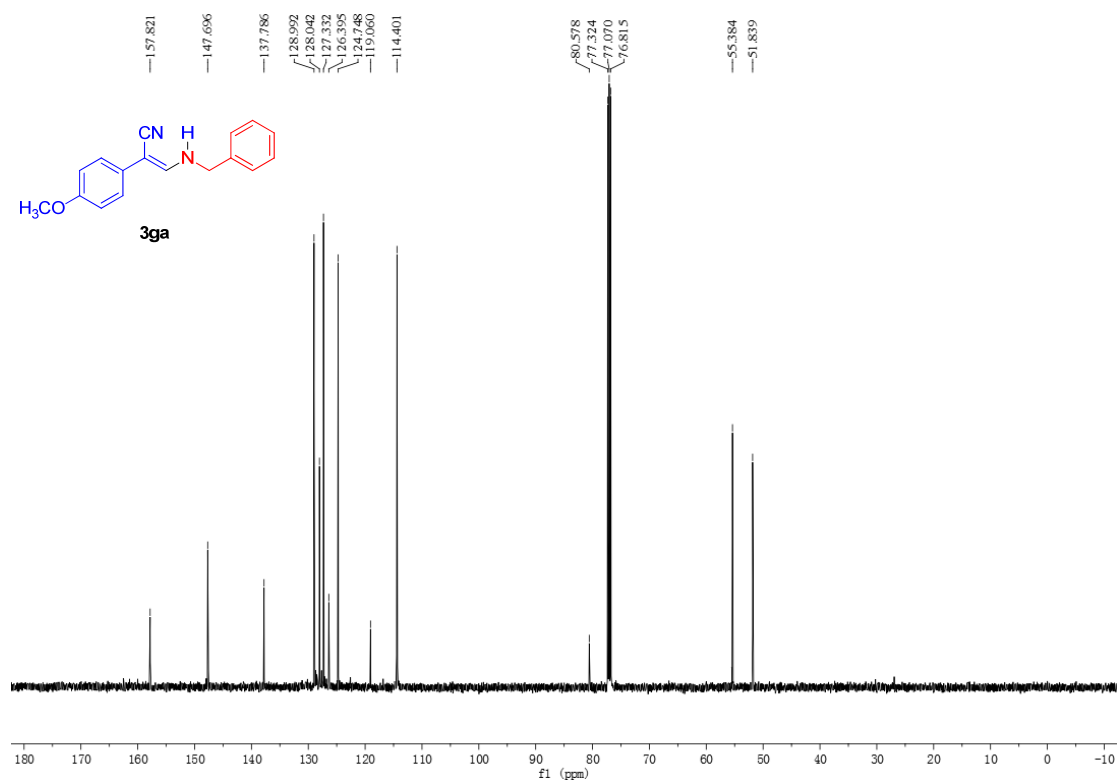

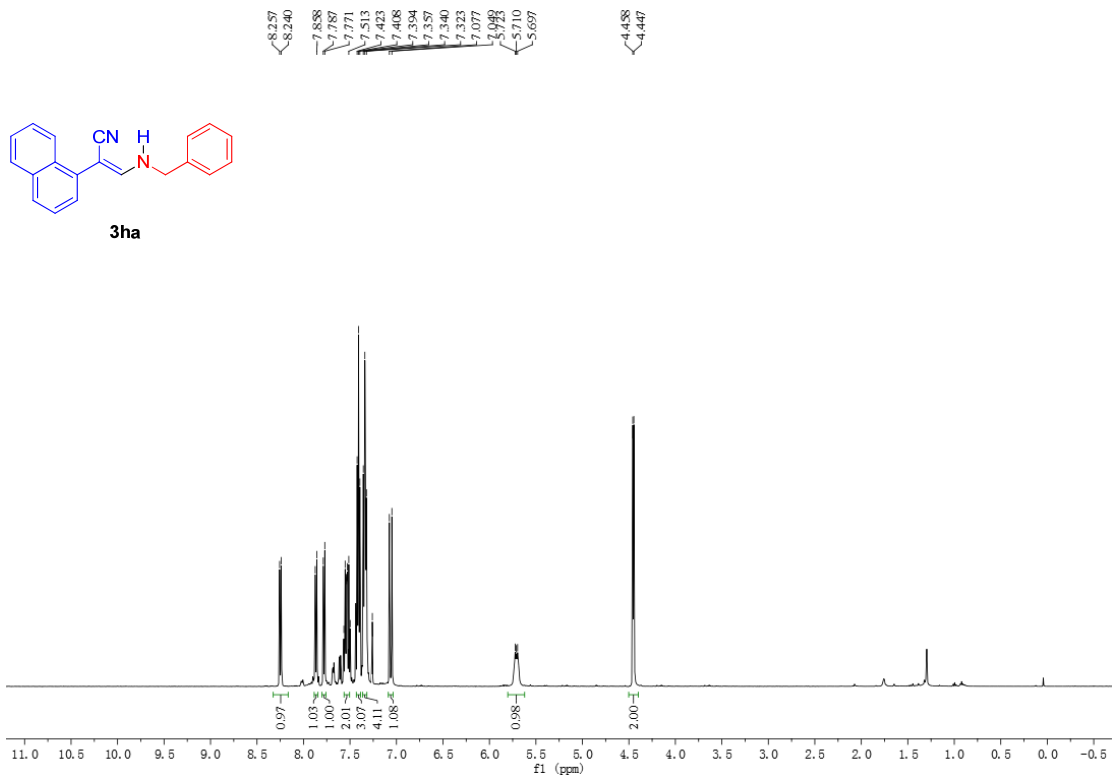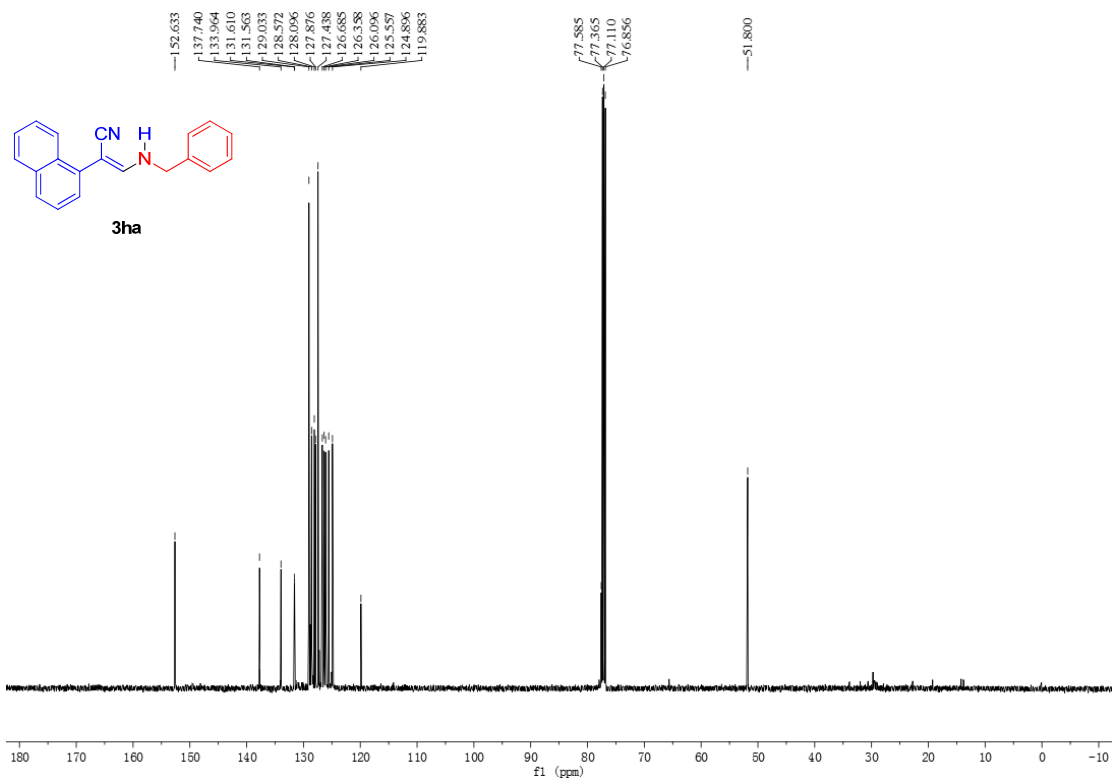

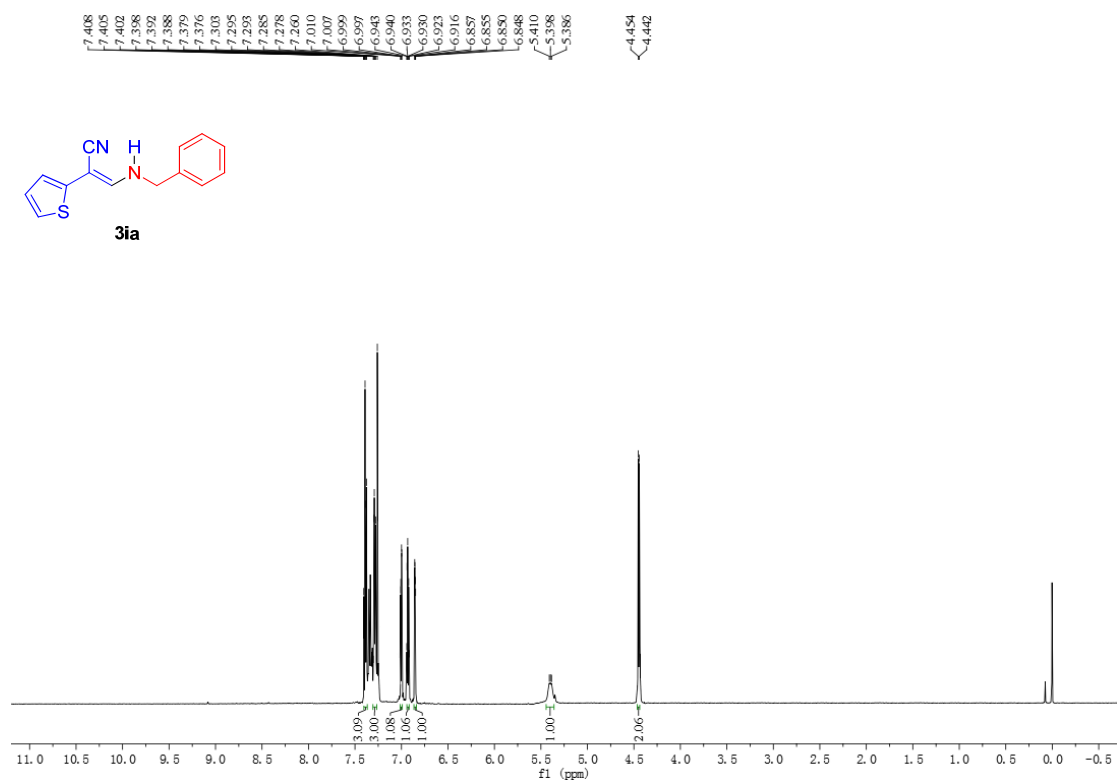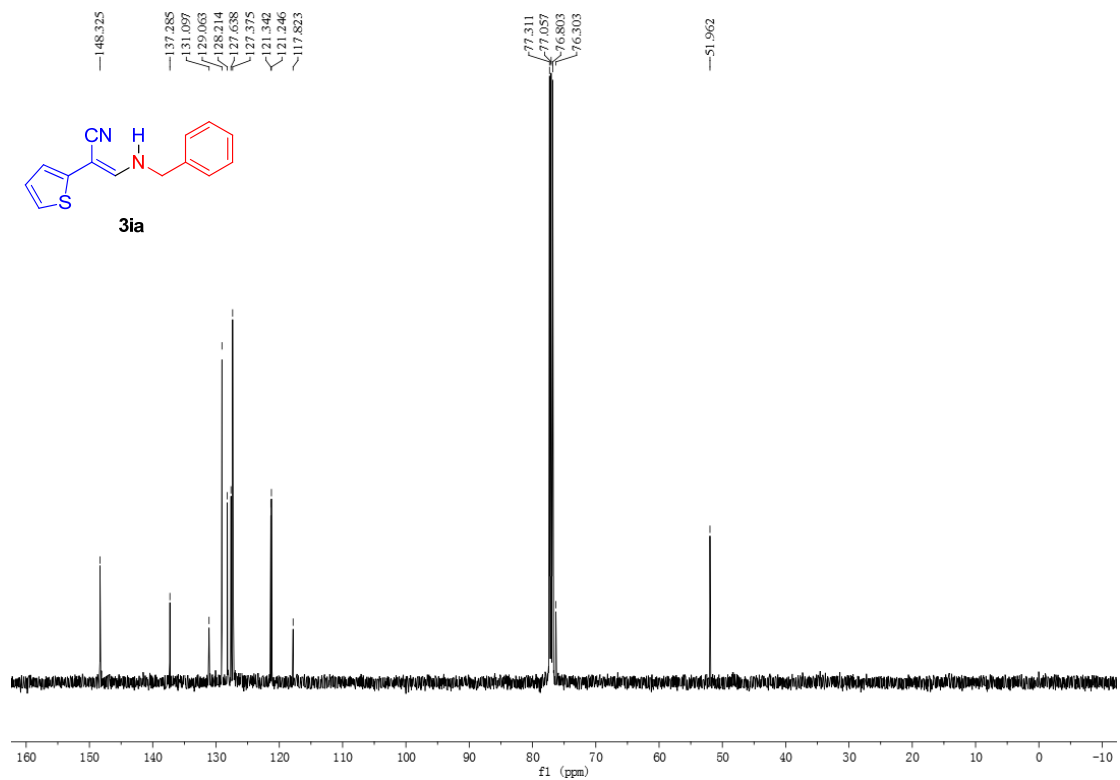

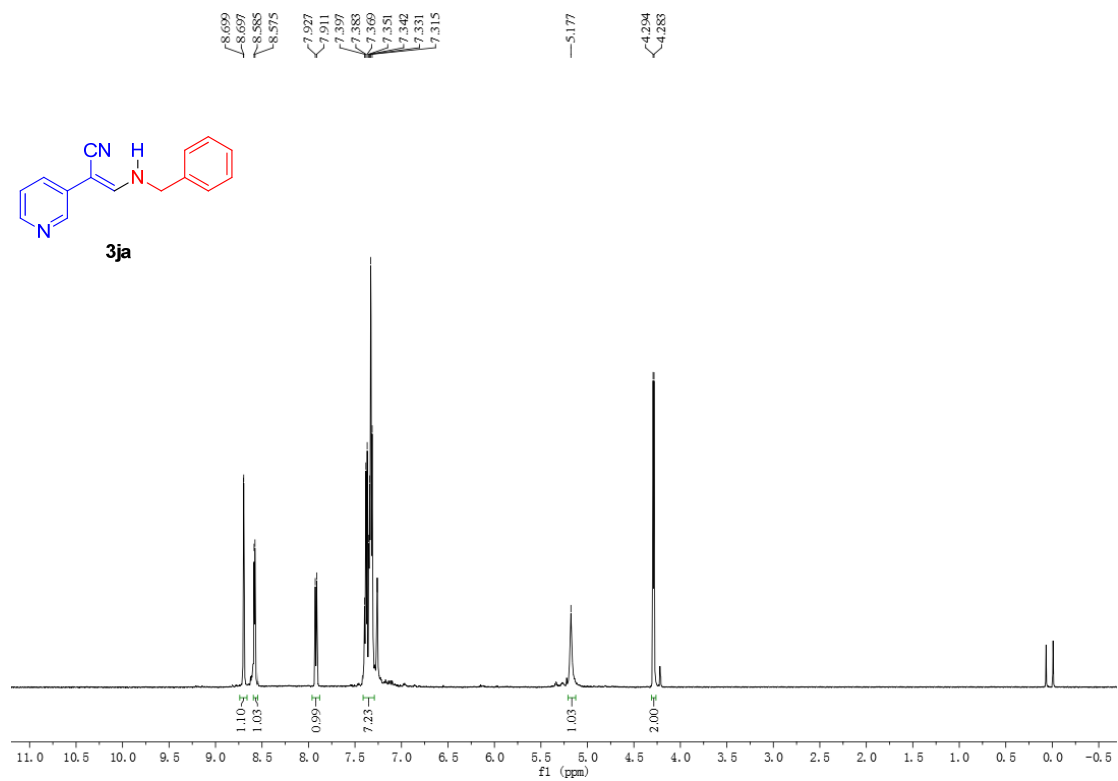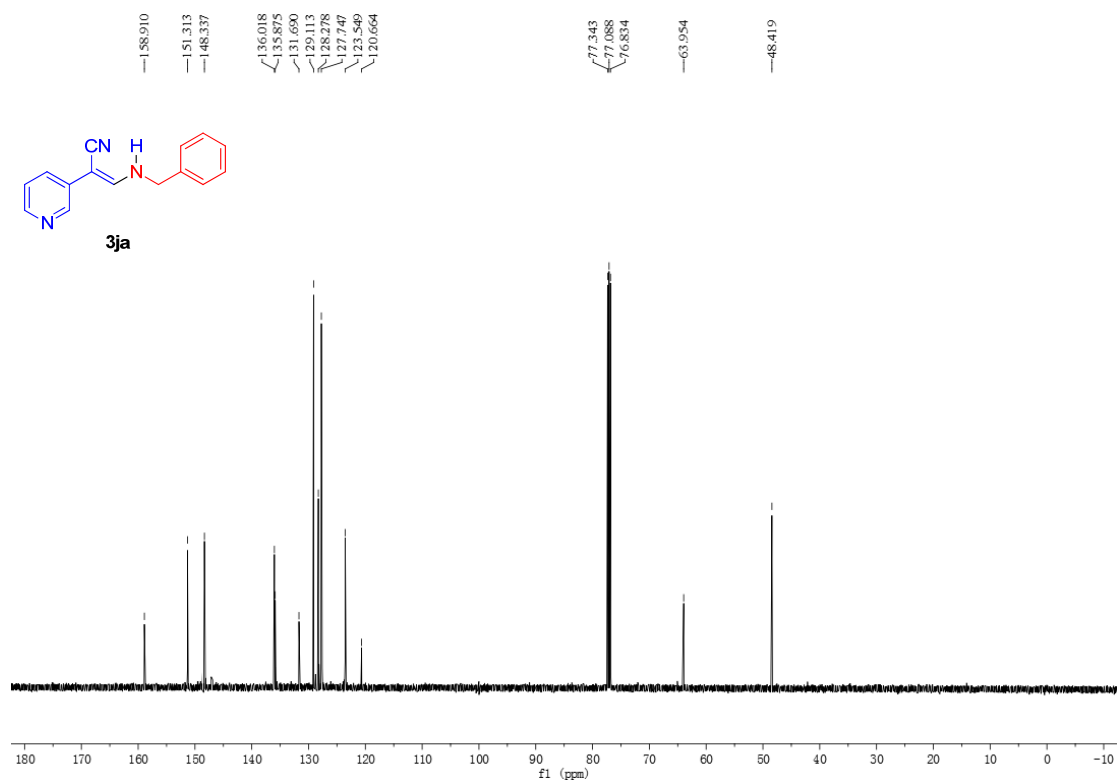

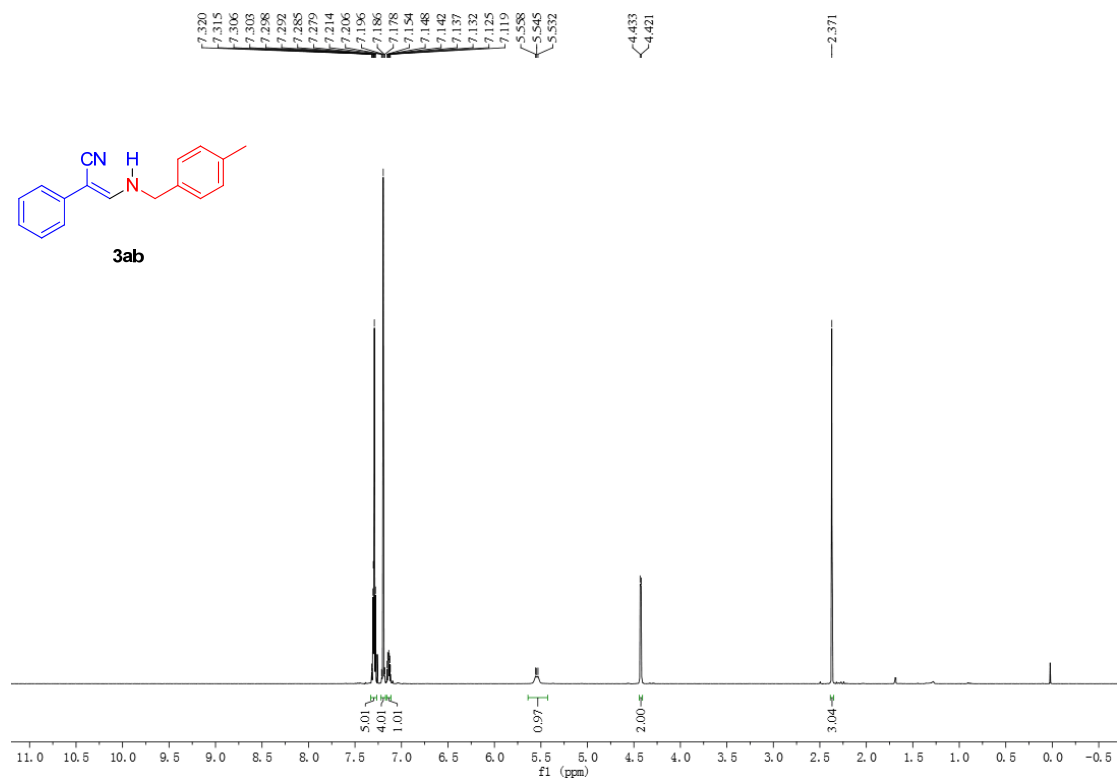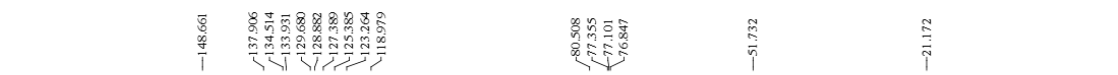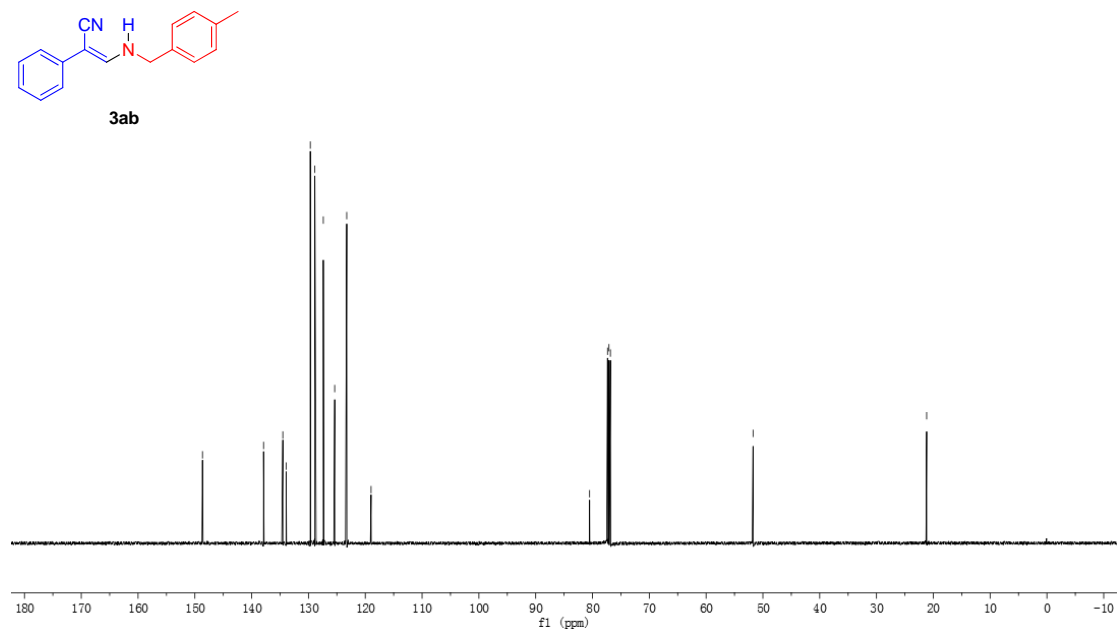

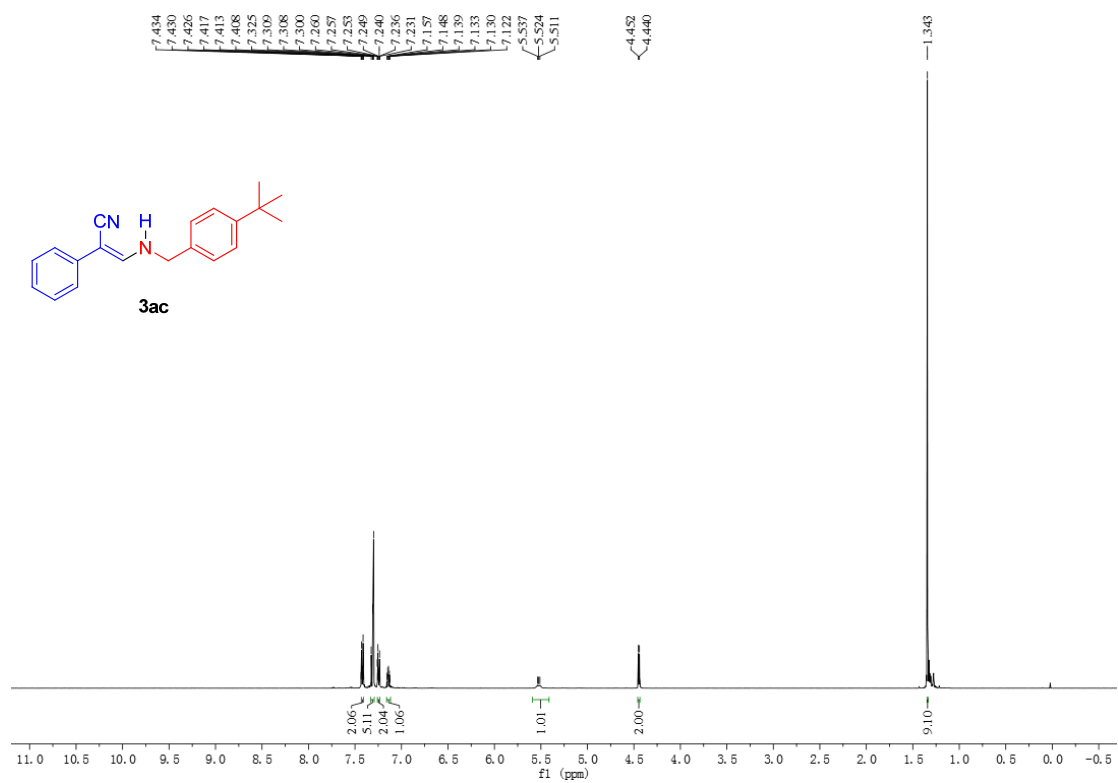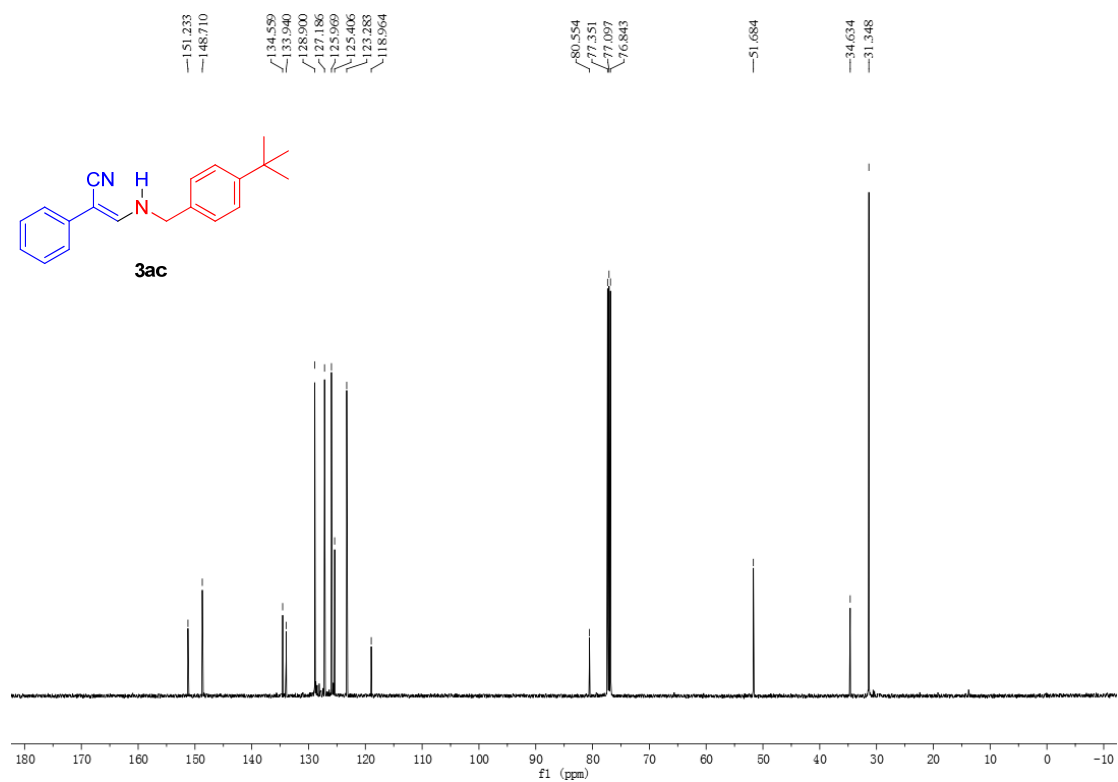



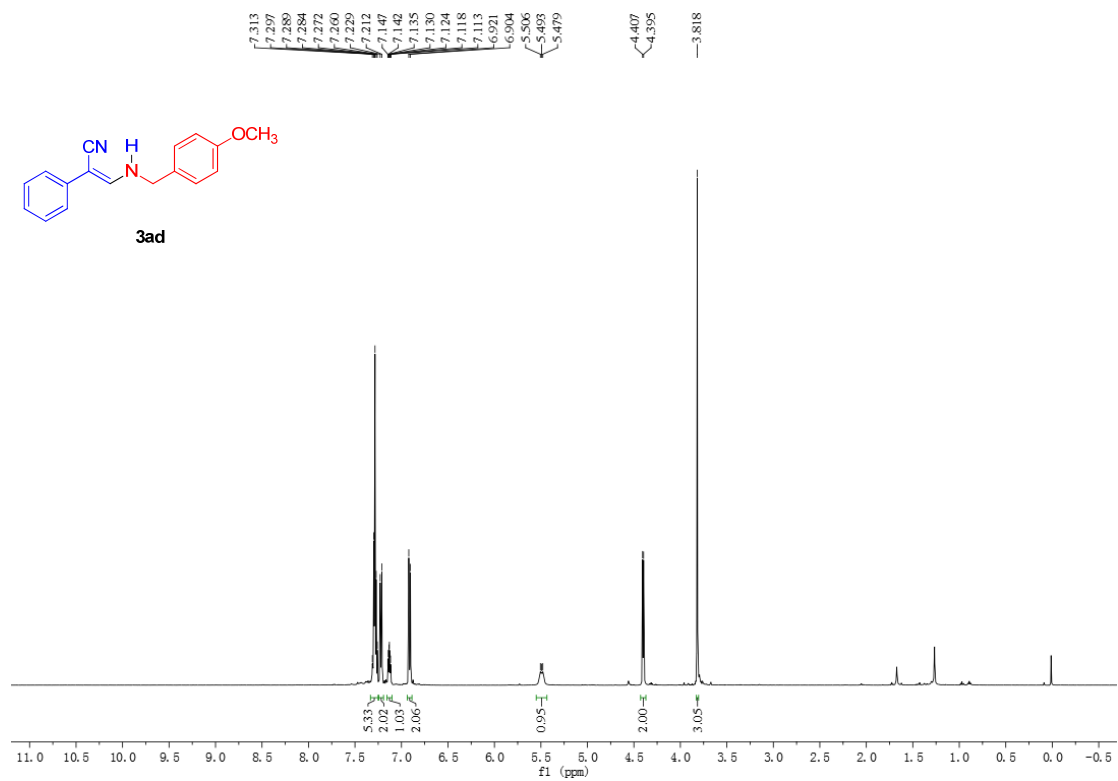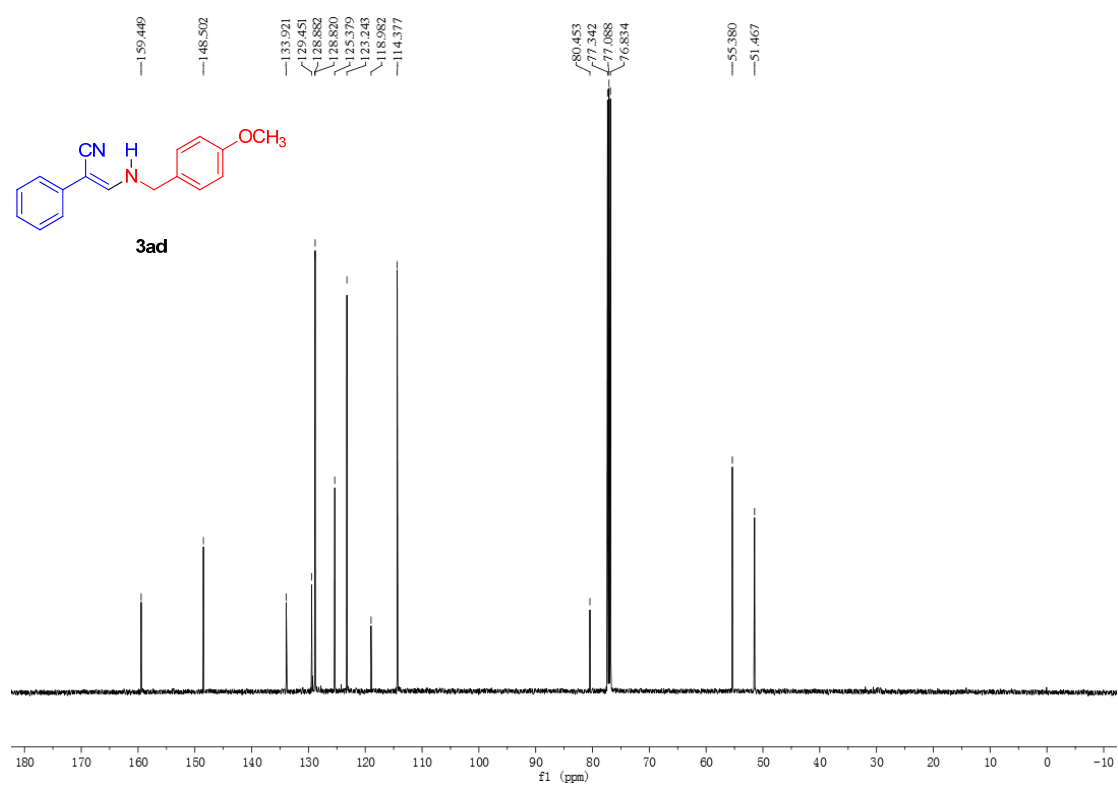

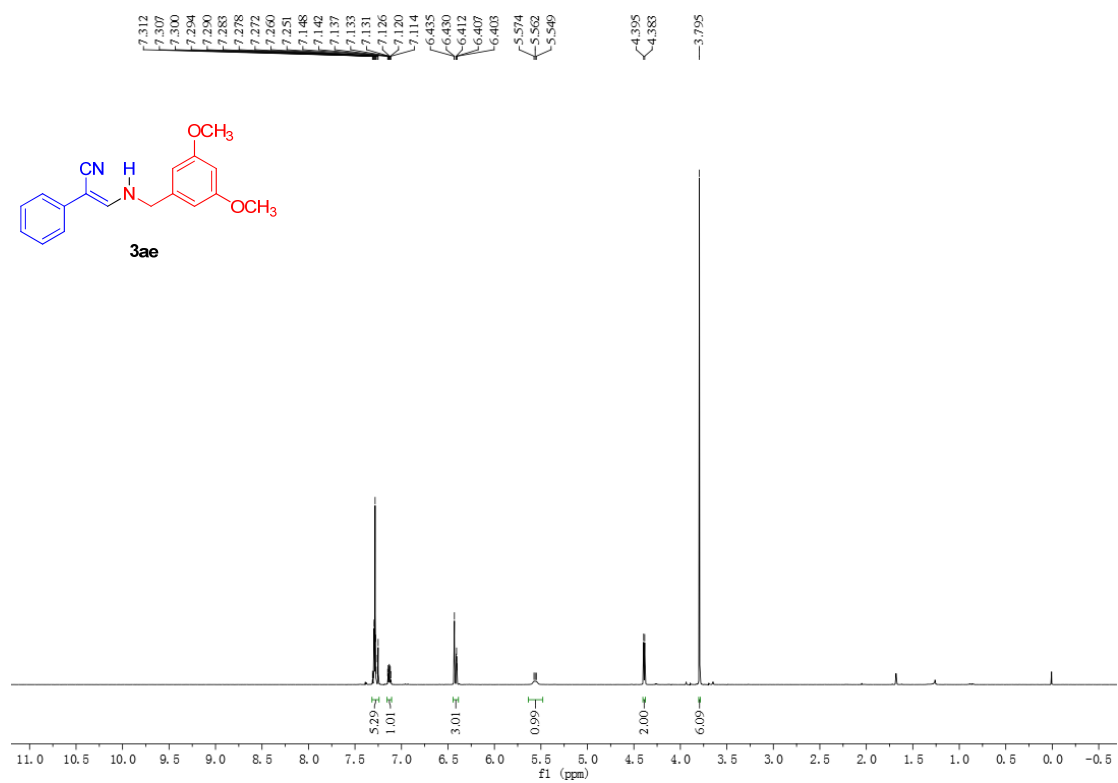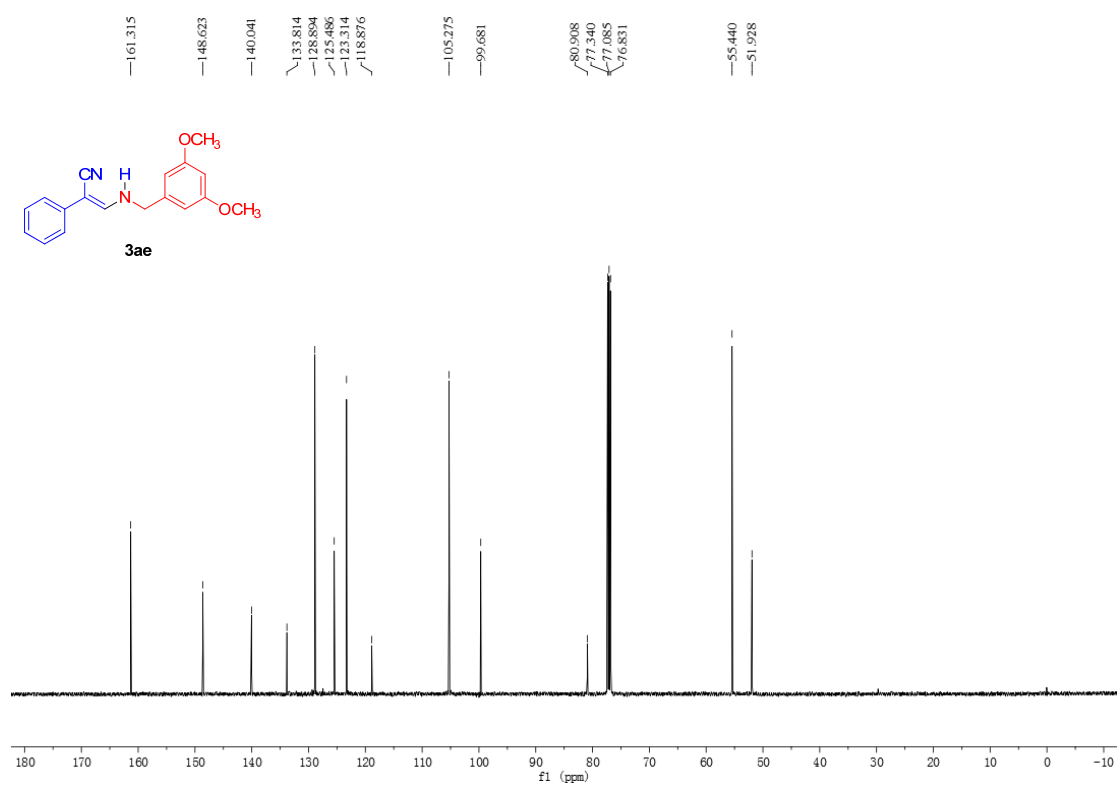

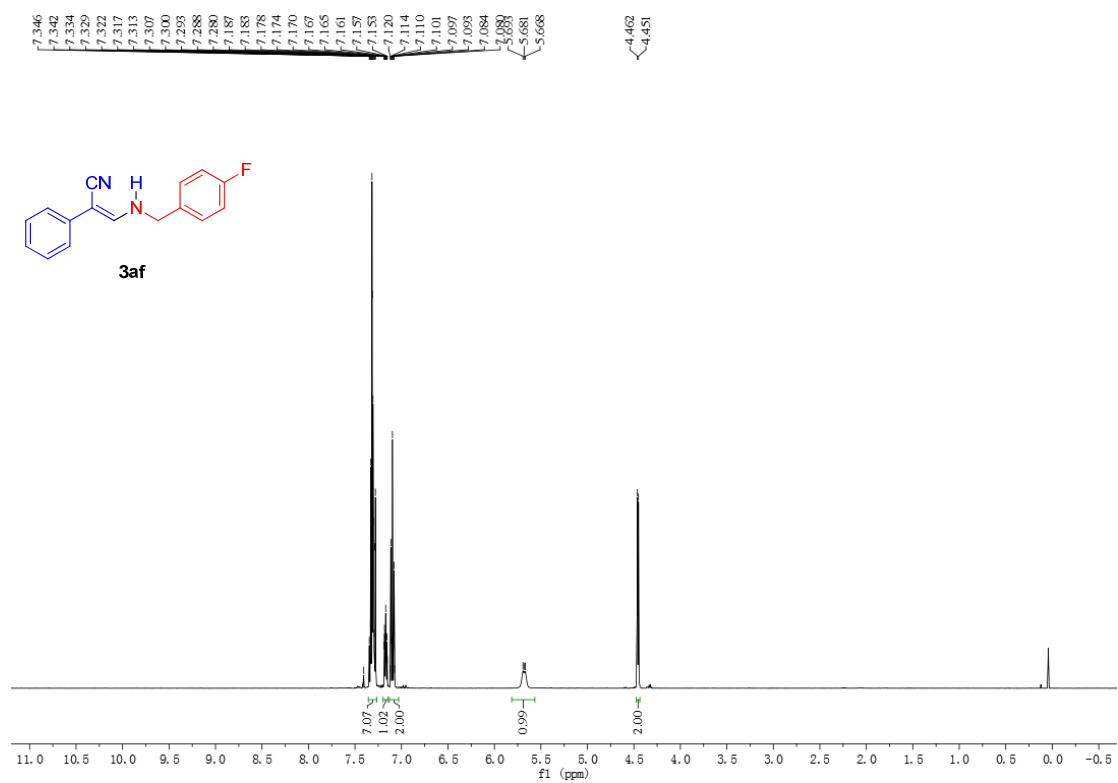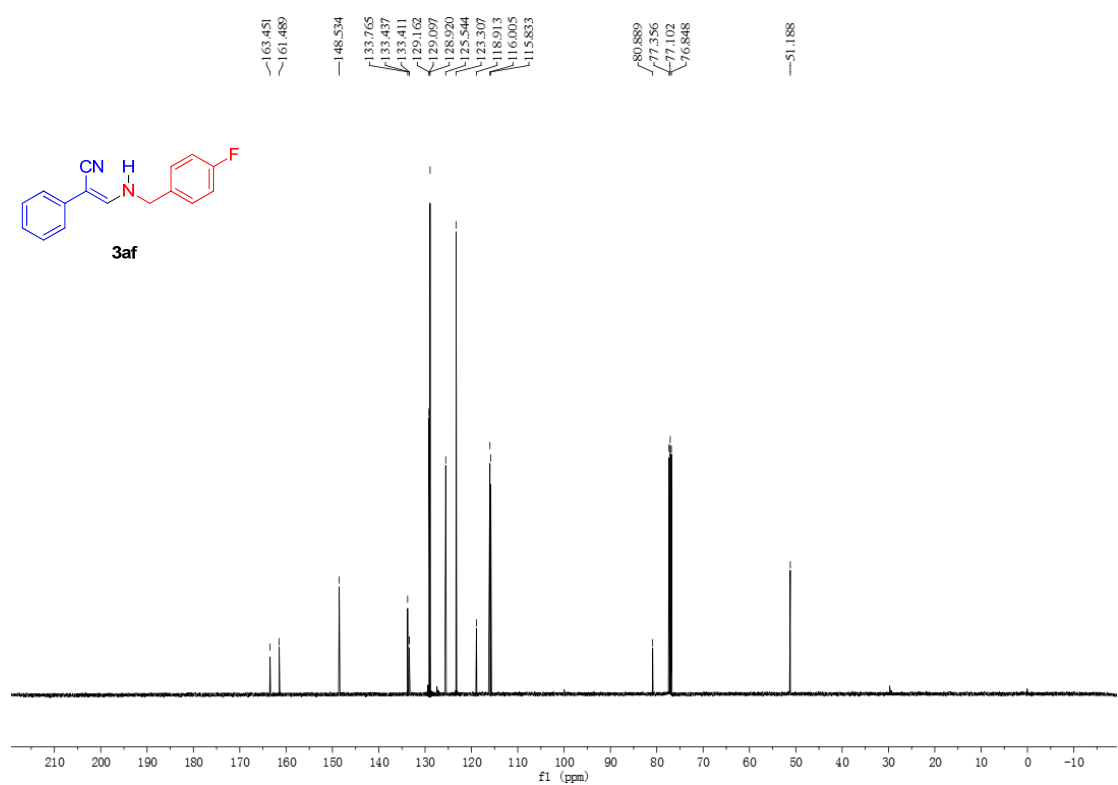

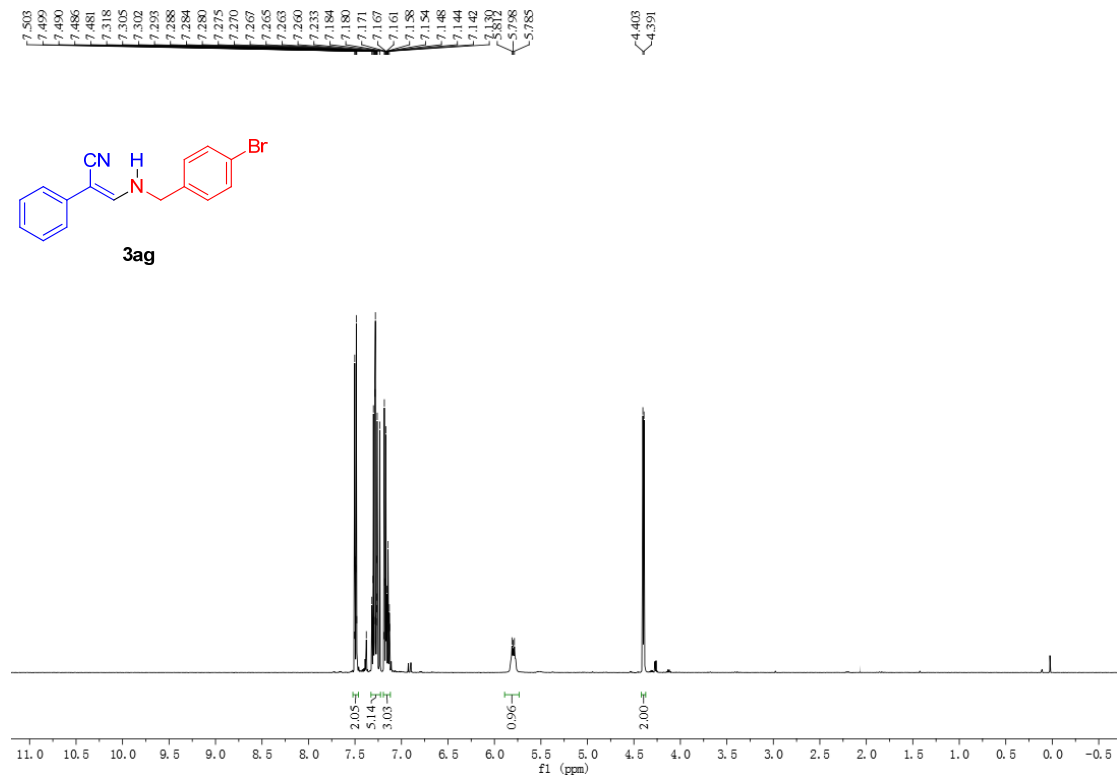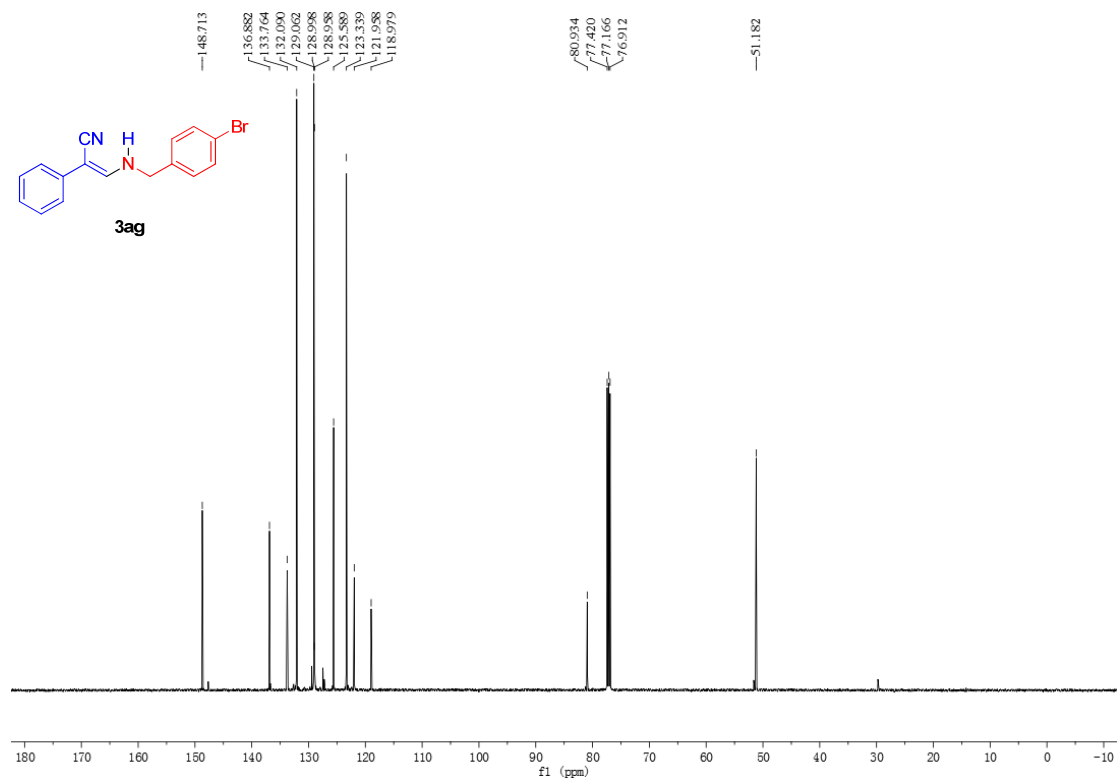

7.695  
7.692  
7.688  
7.679  
7.675  
7.672  
7.457  
7.440  
7.340  
7.327  
7.324  
7.314  
7.310  
7.301  
7.298  
7.293  
7.288  
7.284  
7.281  
7.274  
7.247  
7.193  
7.190  
7.187  
7.179  
7.176  
7.172  
5.469  
5.462  
5.391  
5.388  
5.386  
4.588  
4.546

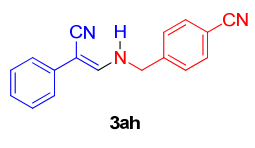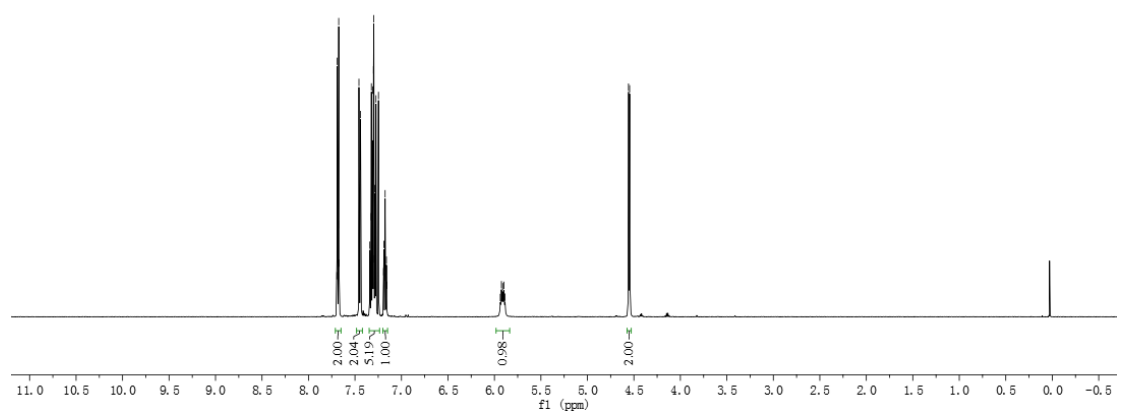

148.569  
143.423  
133.456  
132.777  
128.980  
127.827  
125.838  
123.412  
118.753  
118.549  
111.864  
81.755  
77.374  
77.120  
76.865  
51.237

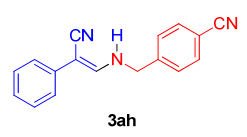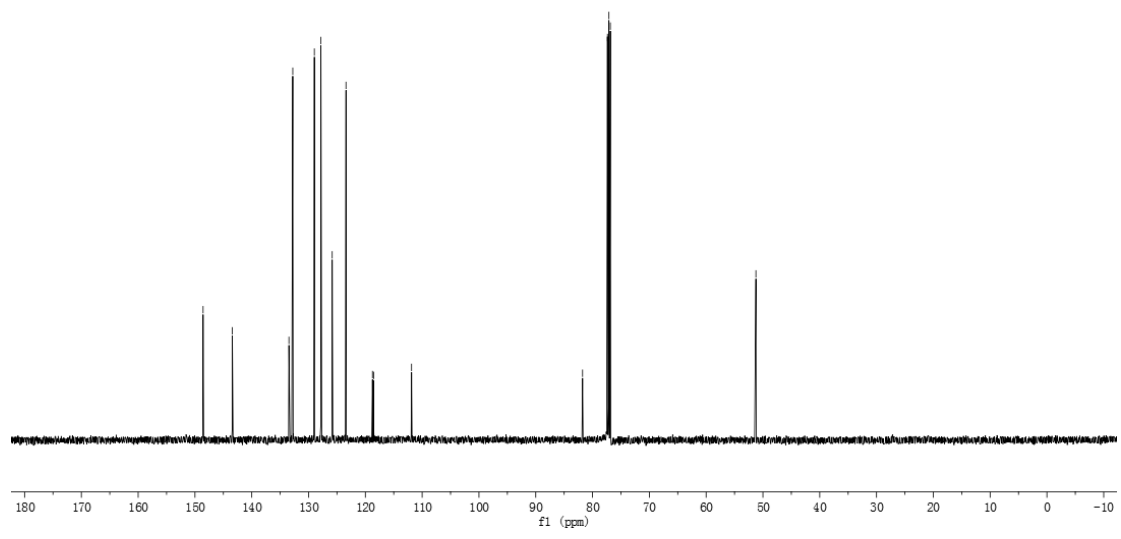

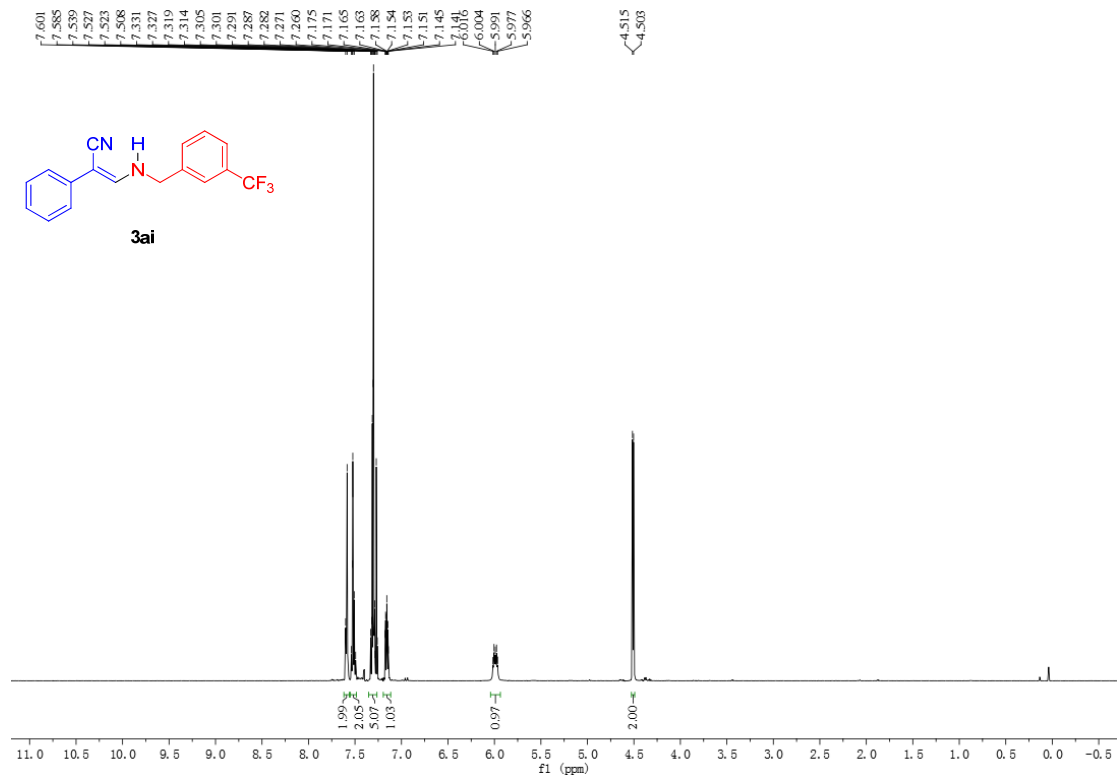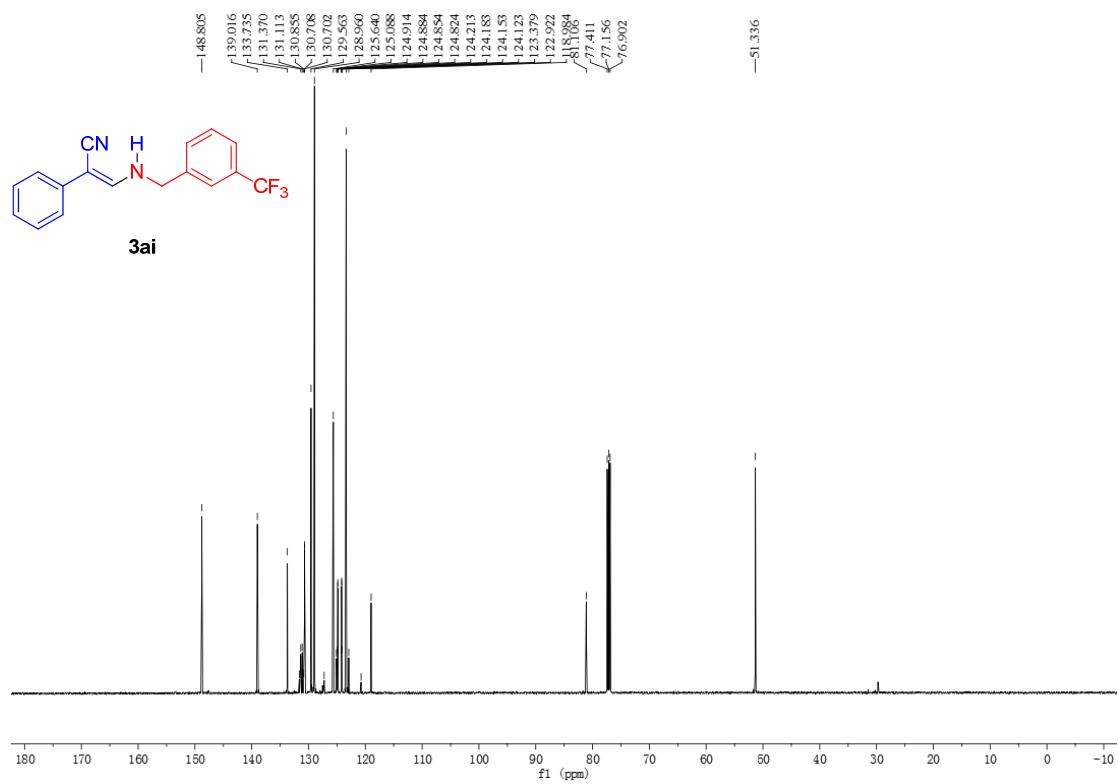

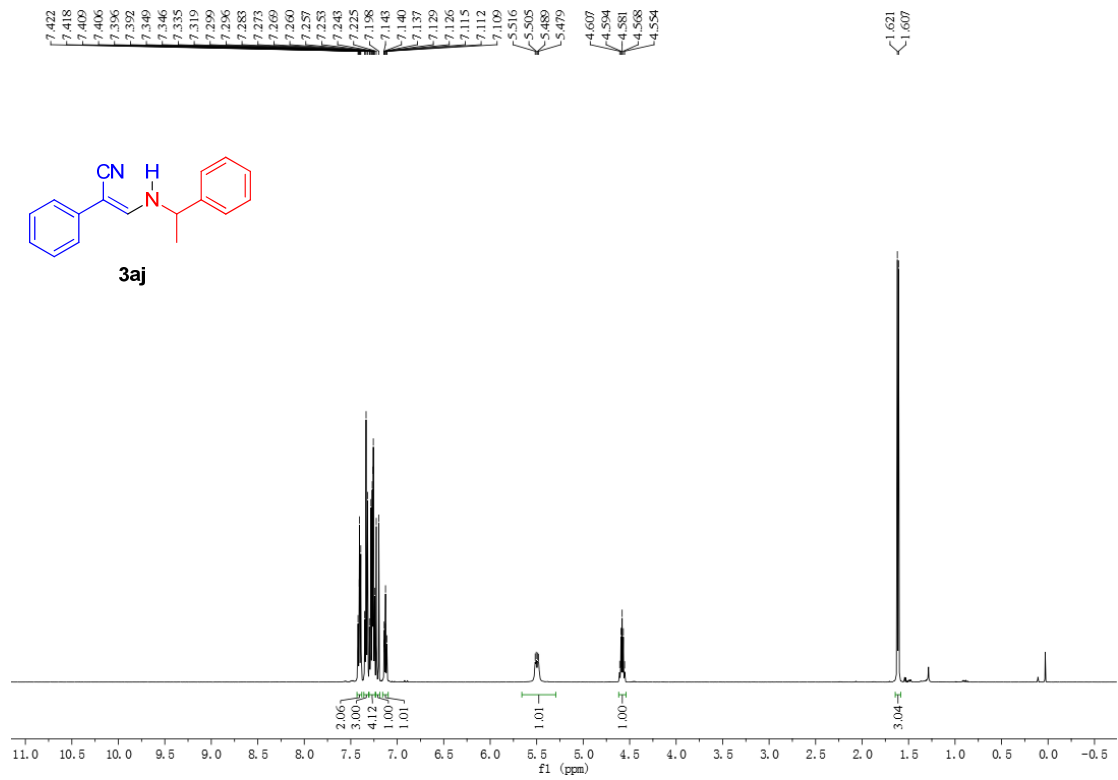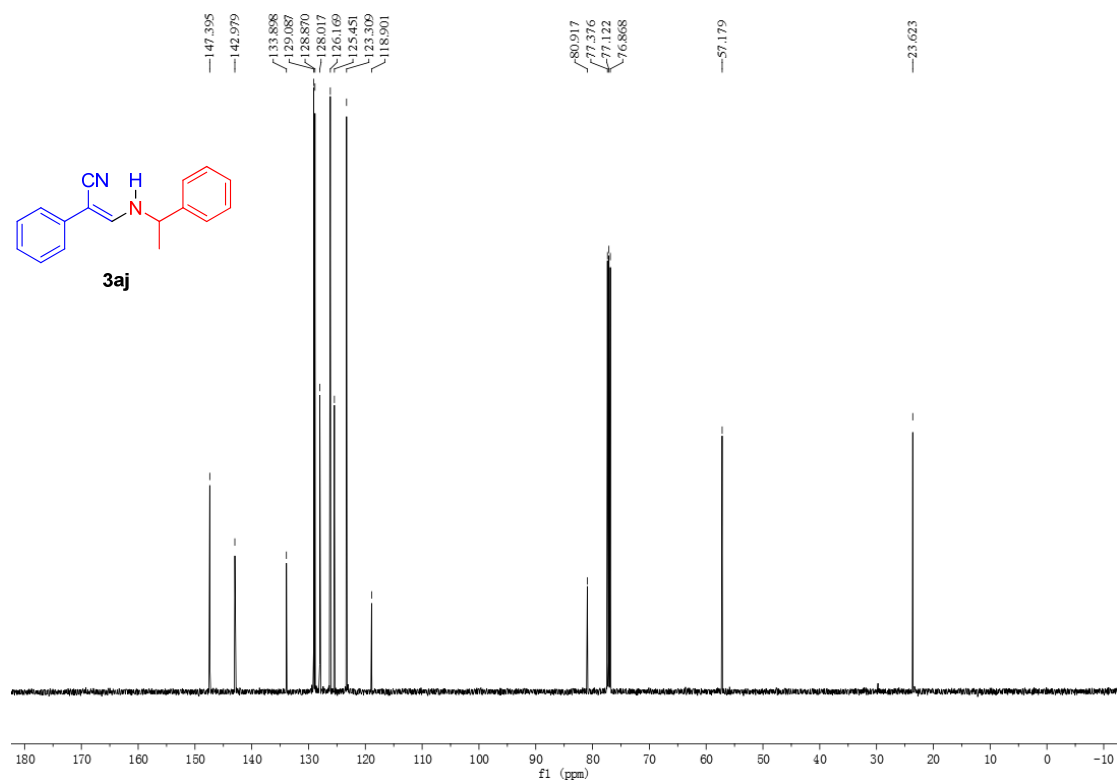

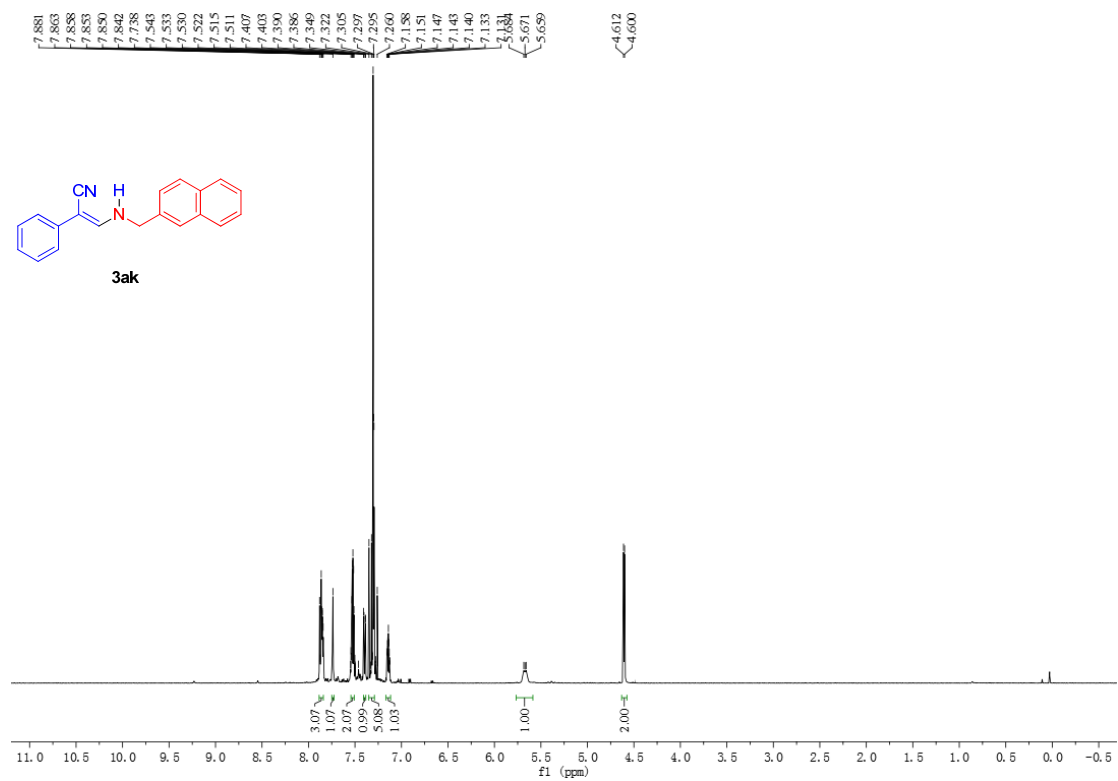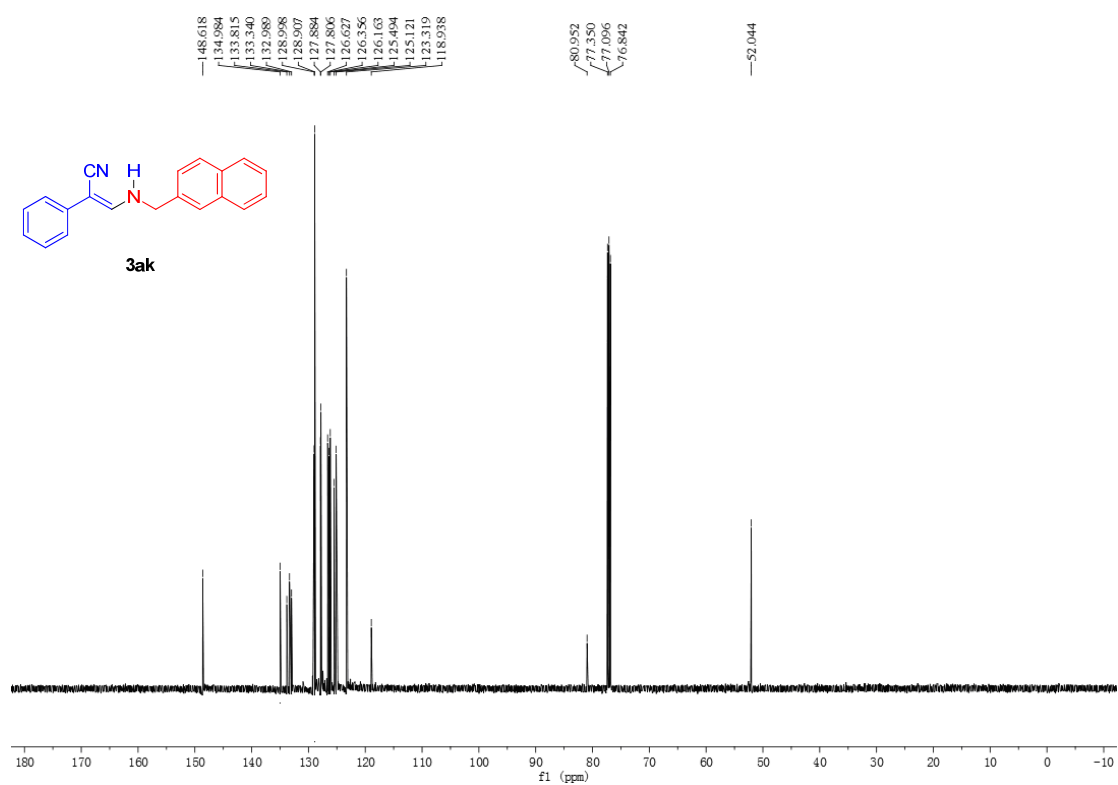



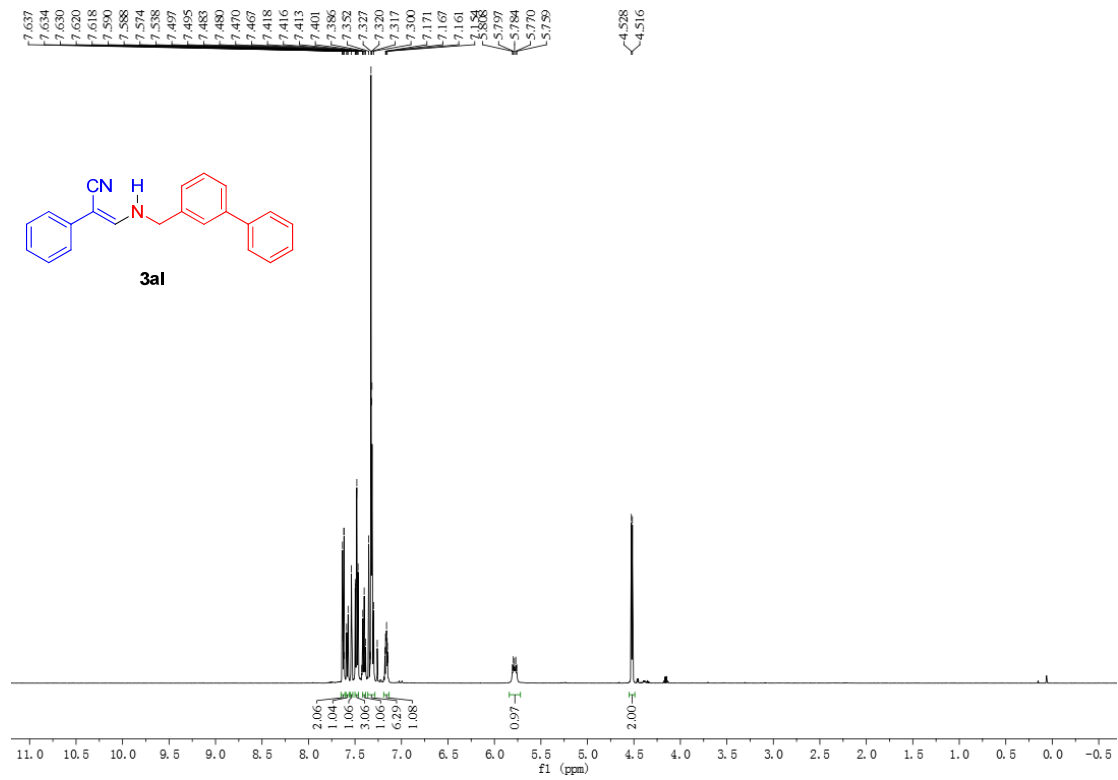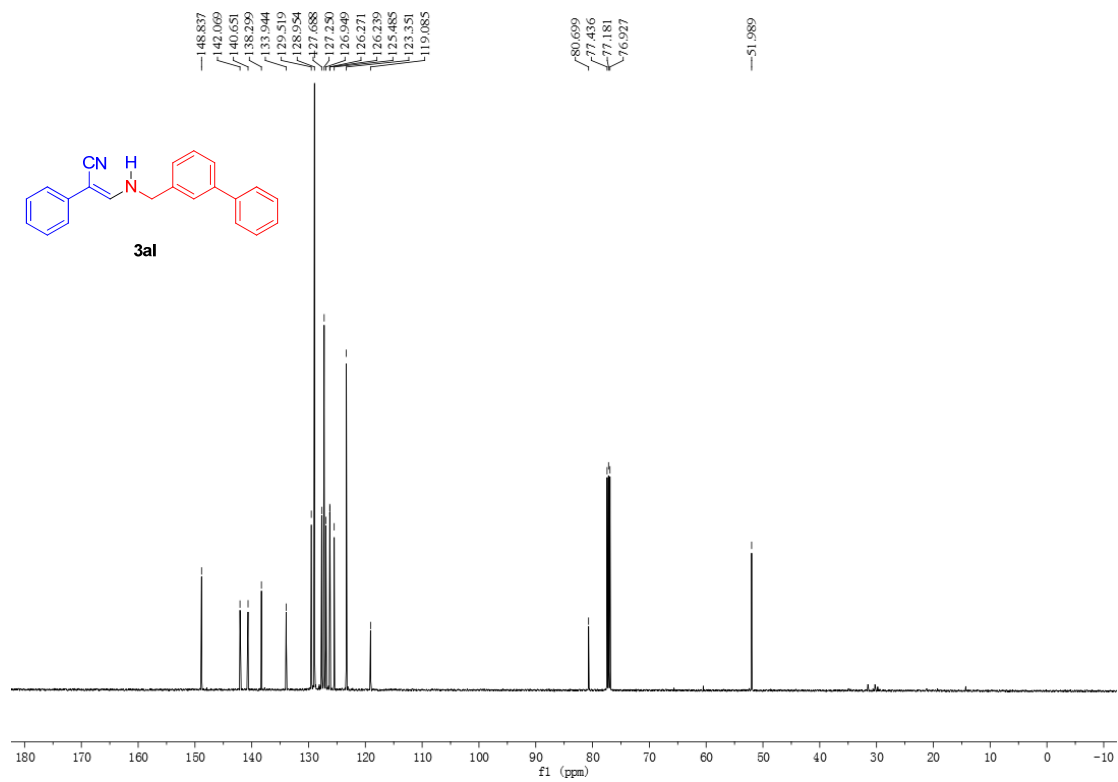

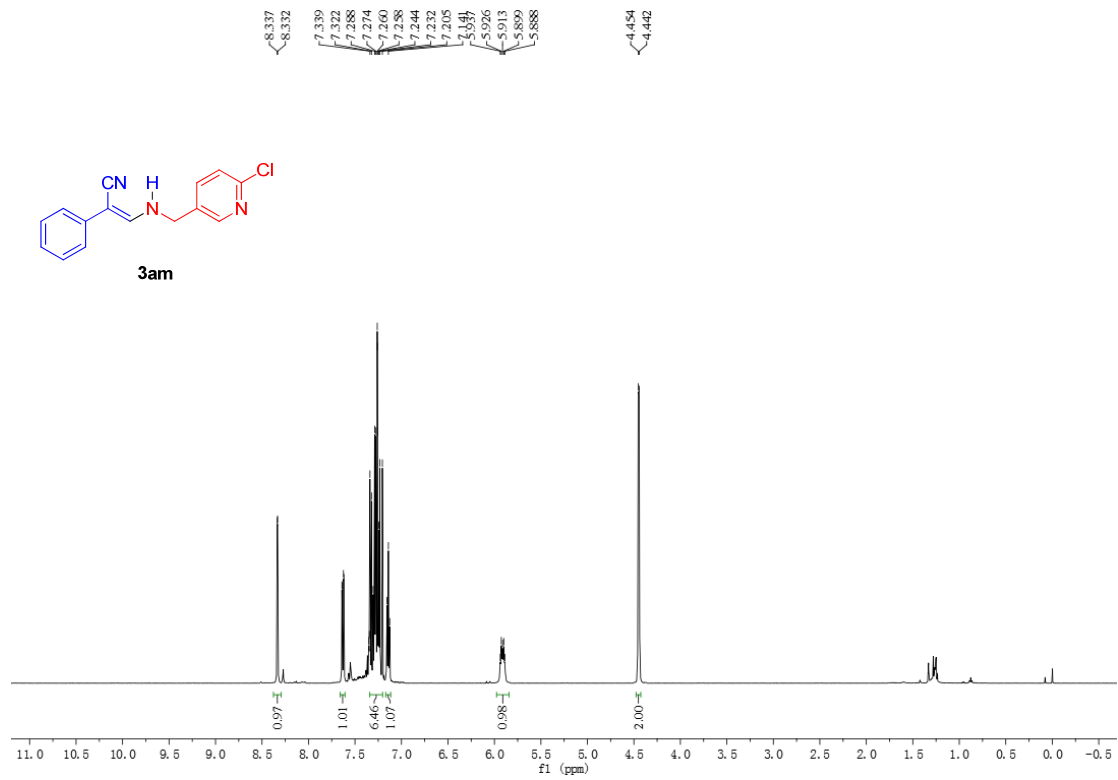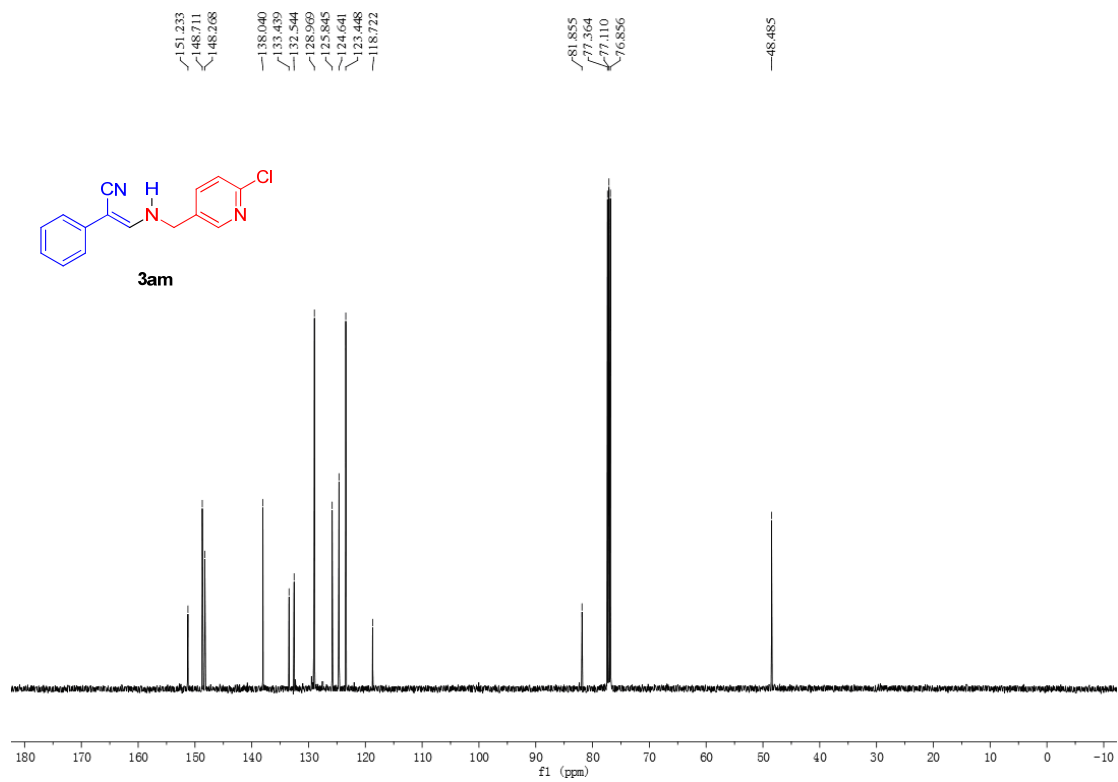

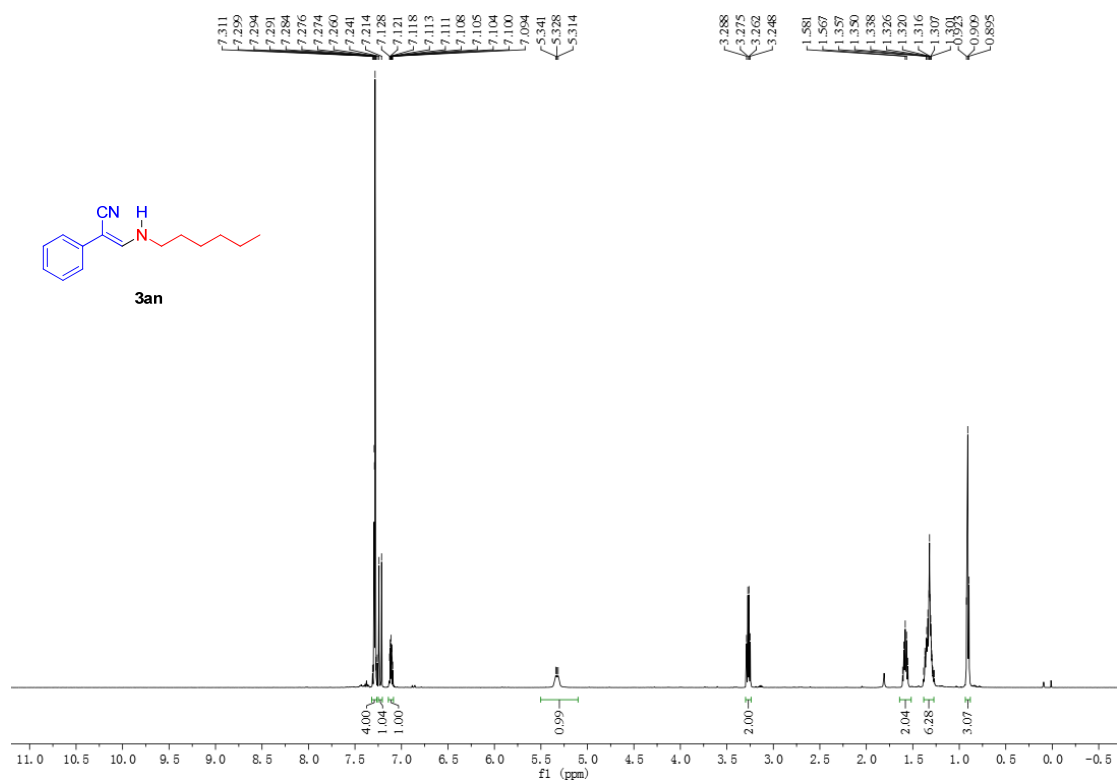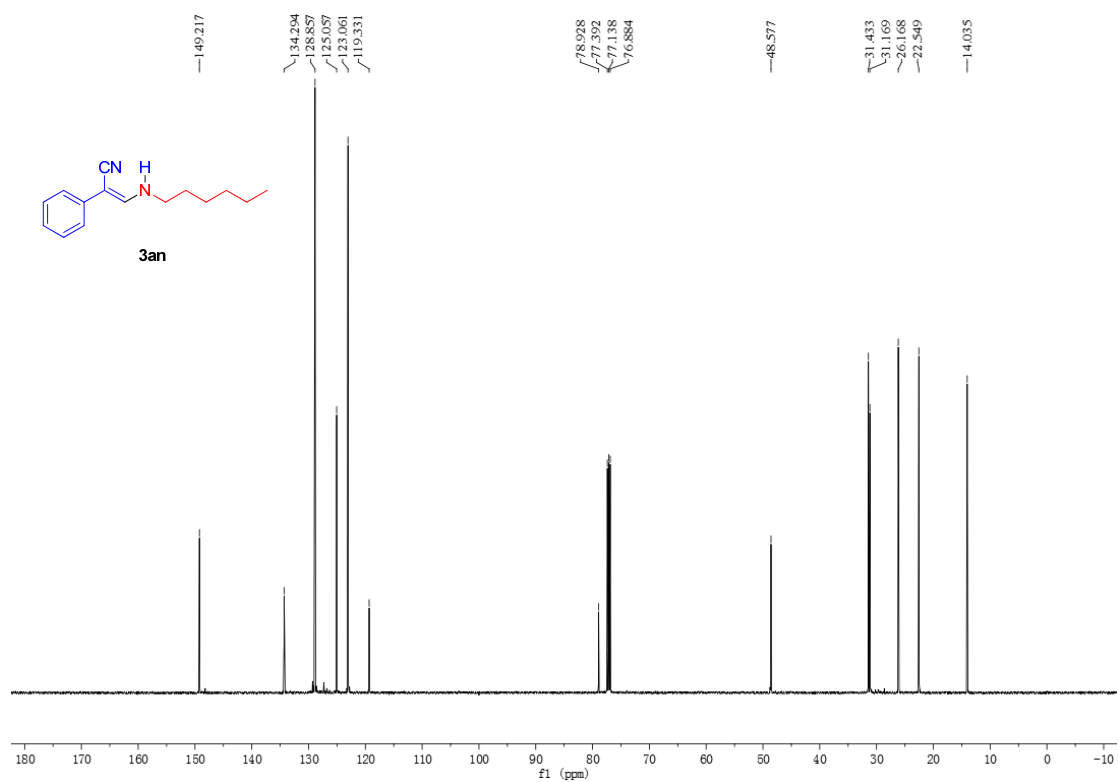

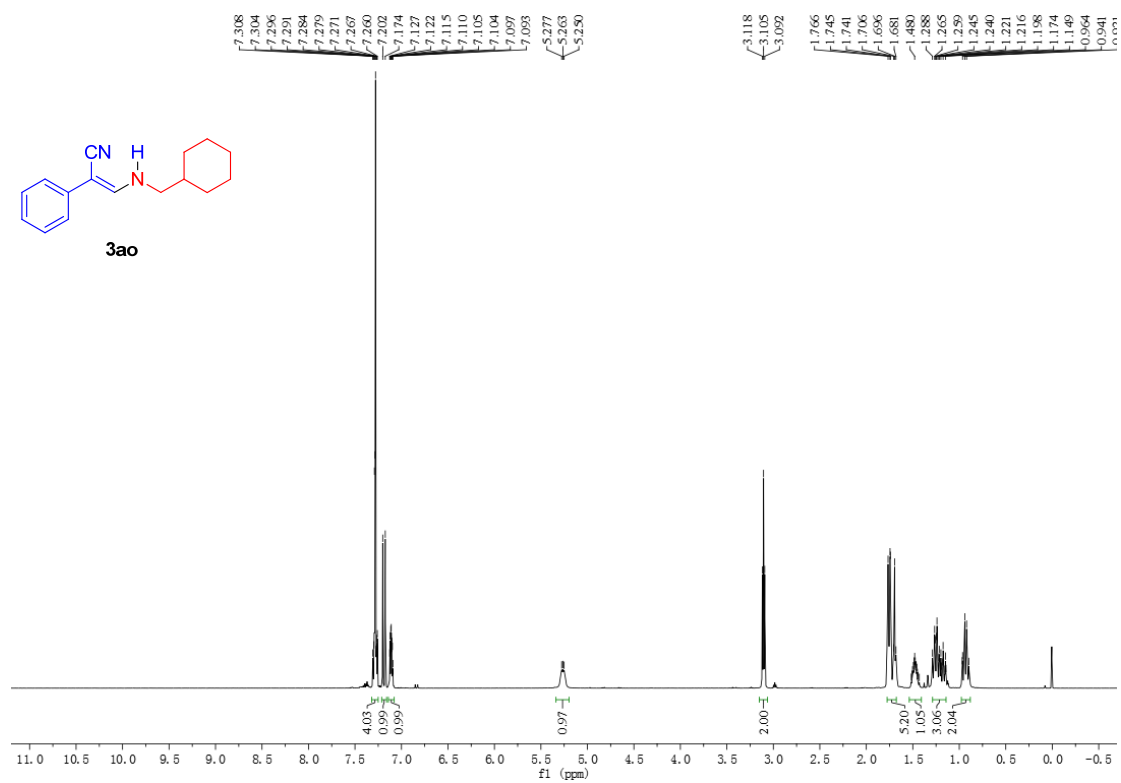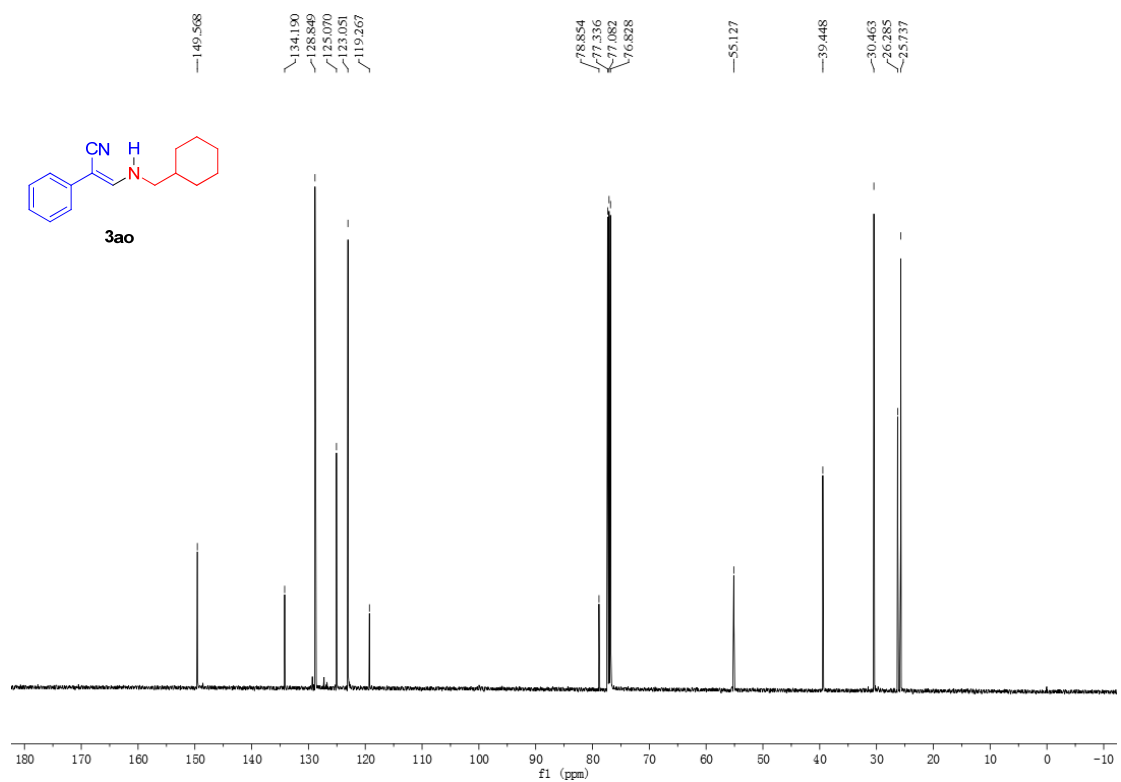

T: FTMS - p ESI Full ms [200.00-500.00]

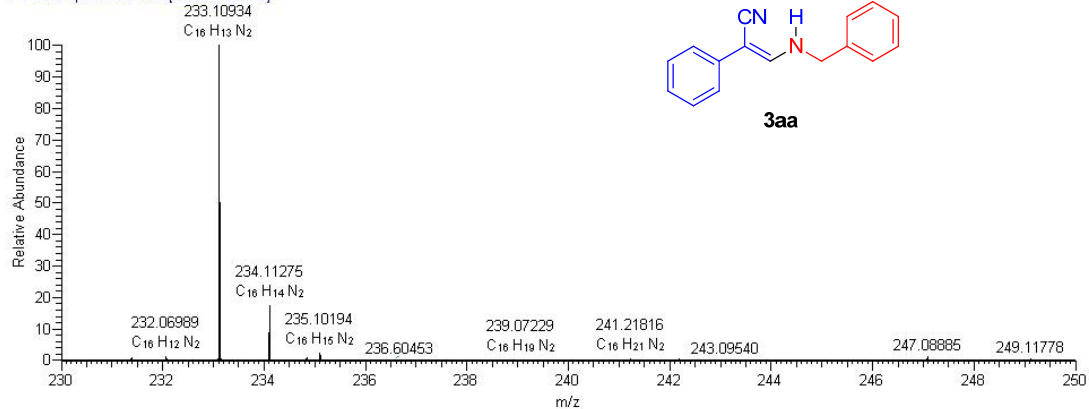

T: FTMS - p ESI Full lock ms [200.00-300.00]

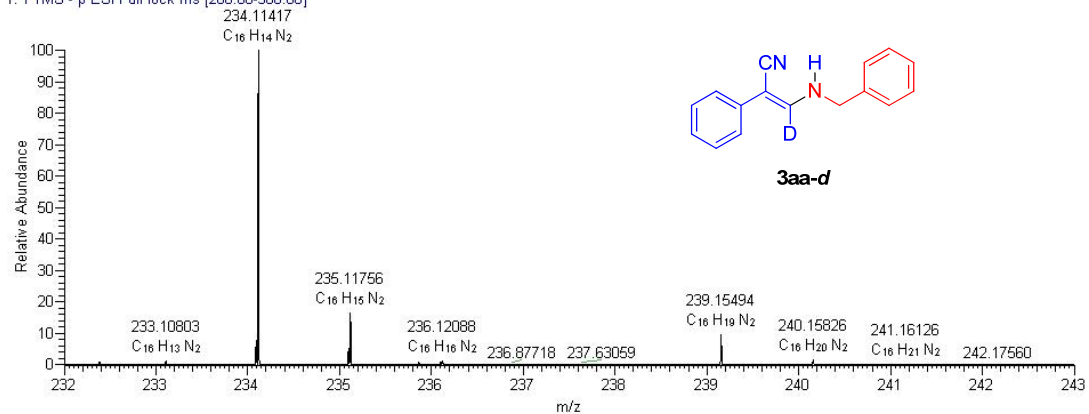

T: FTMS - p ESI Full ms [200.00-300.00]

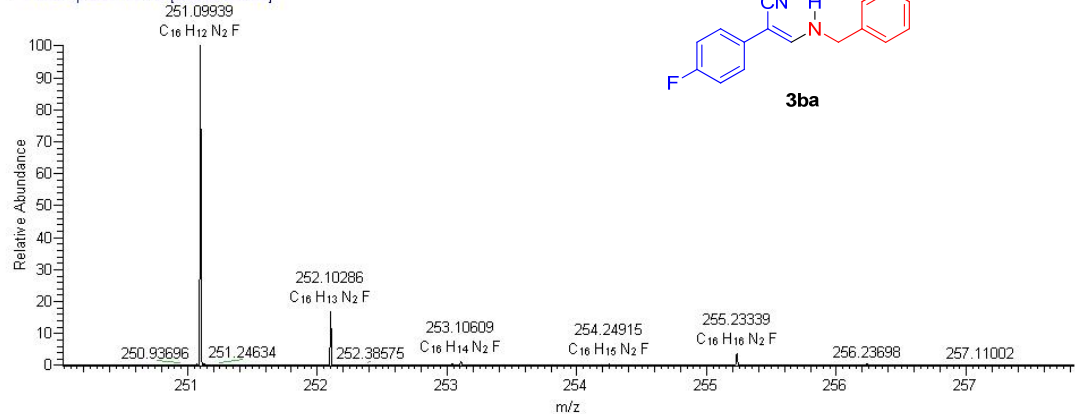

T: FTMS - p ESI Full lock ms [225.00-350.00]

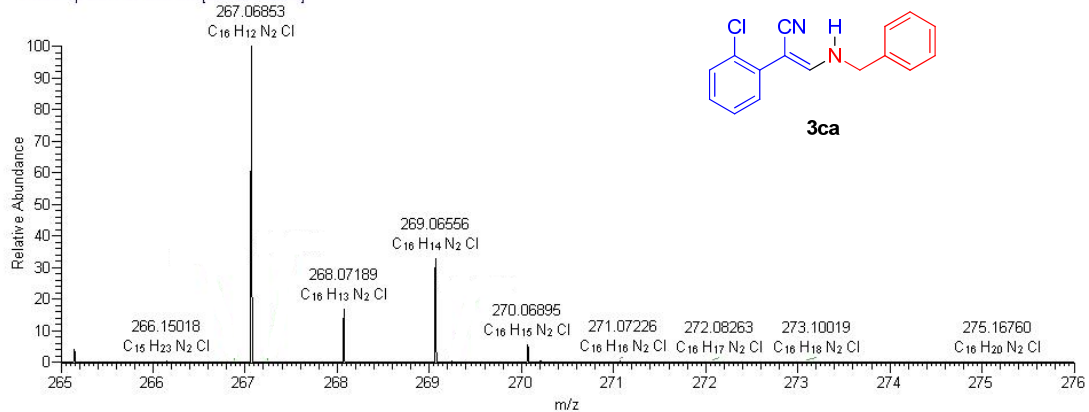

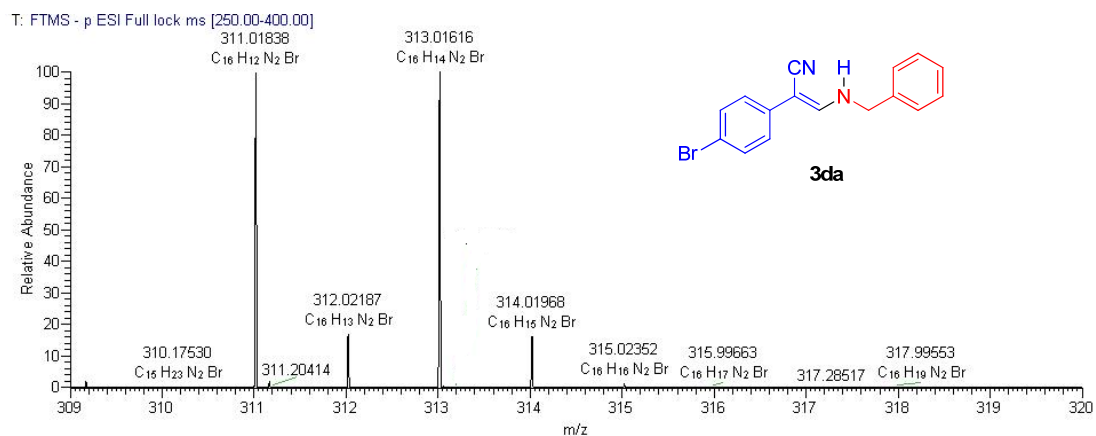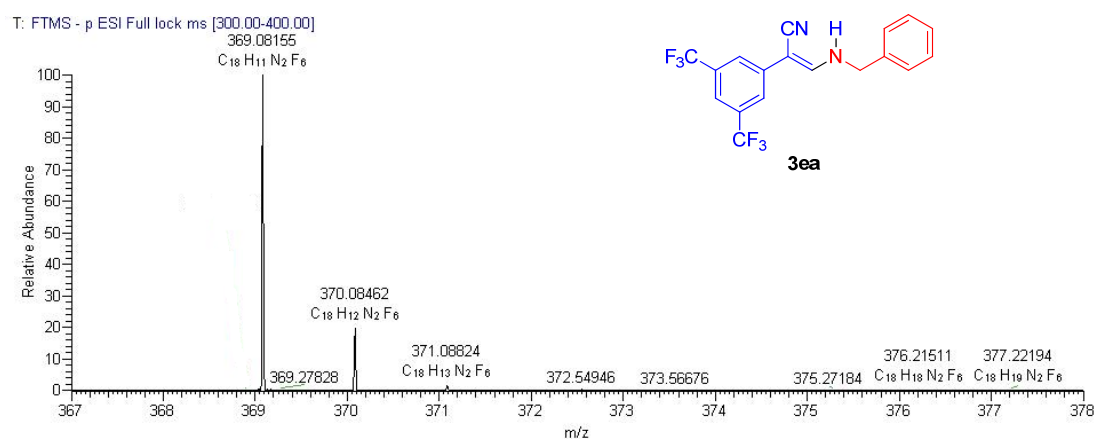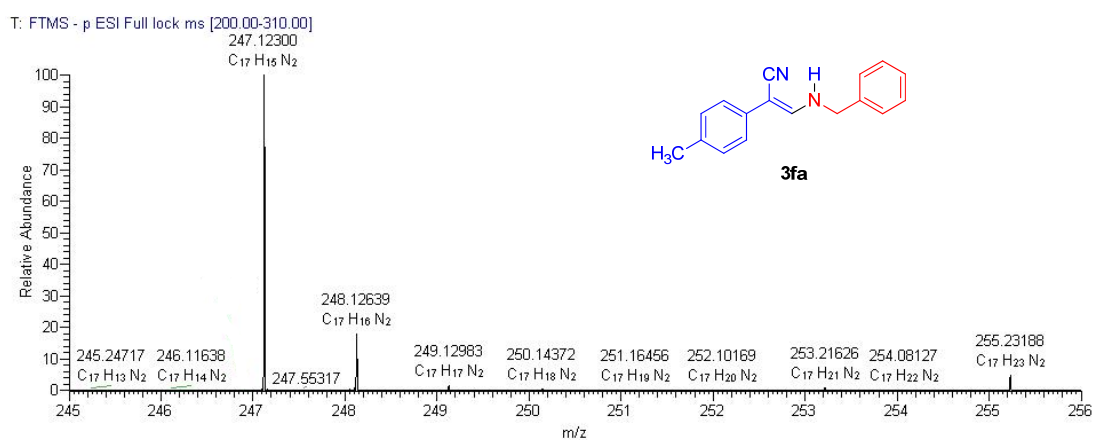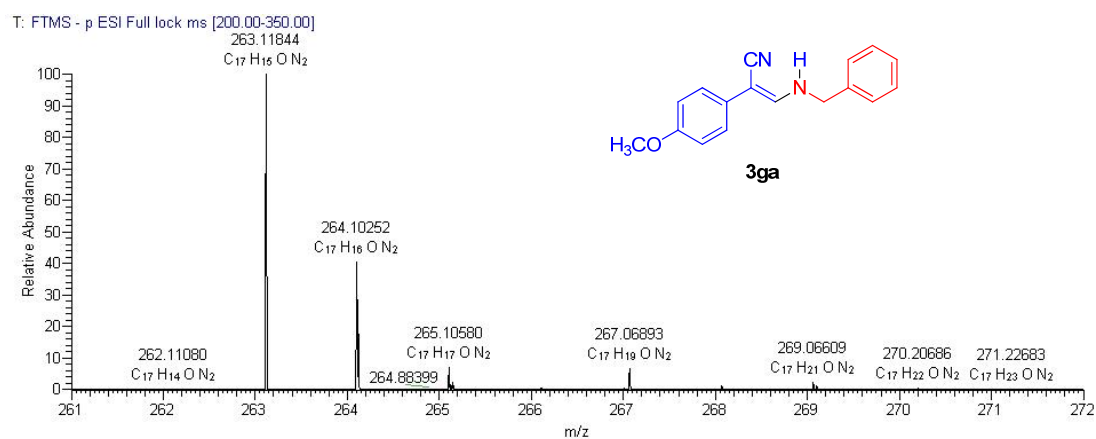

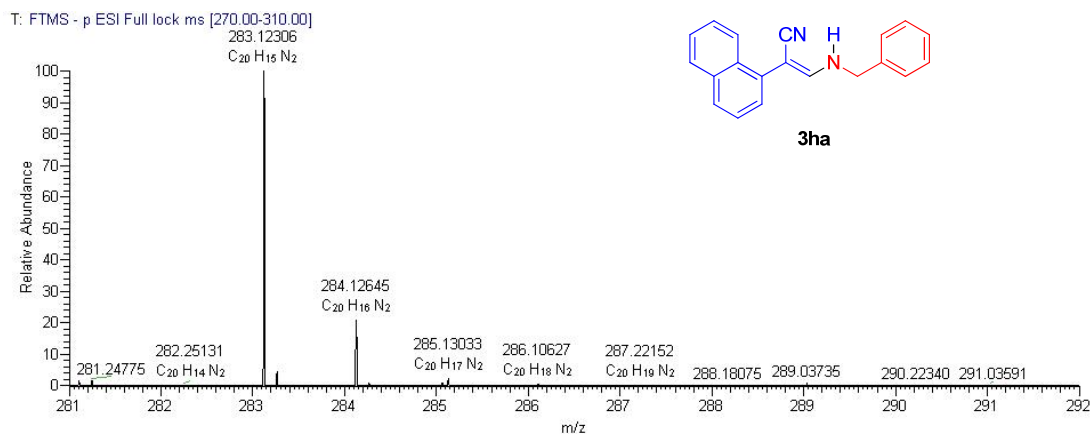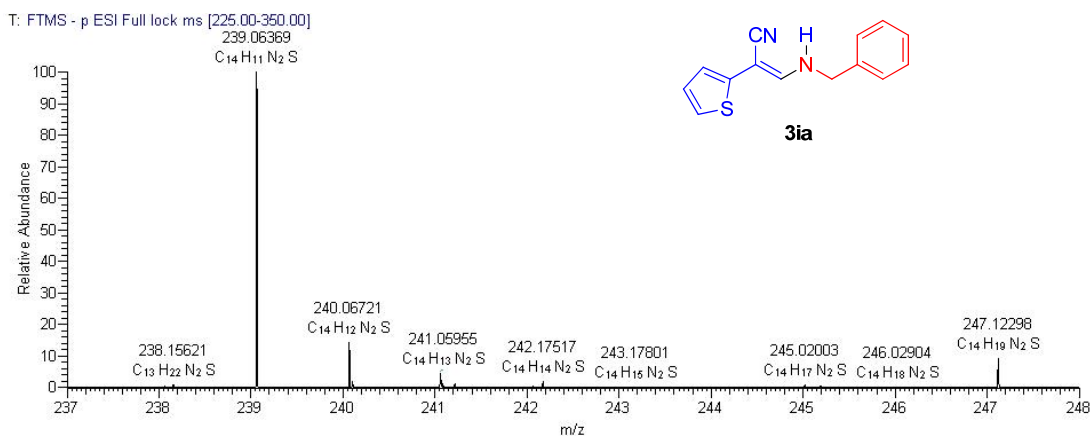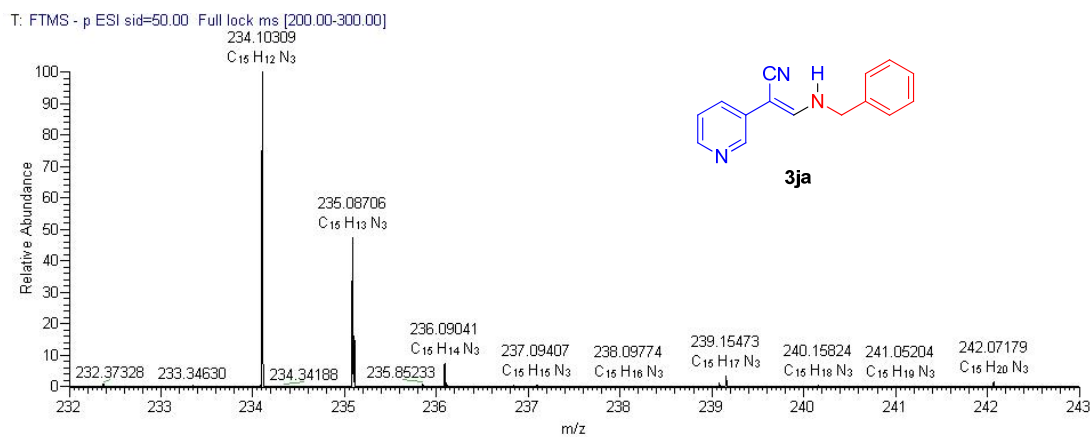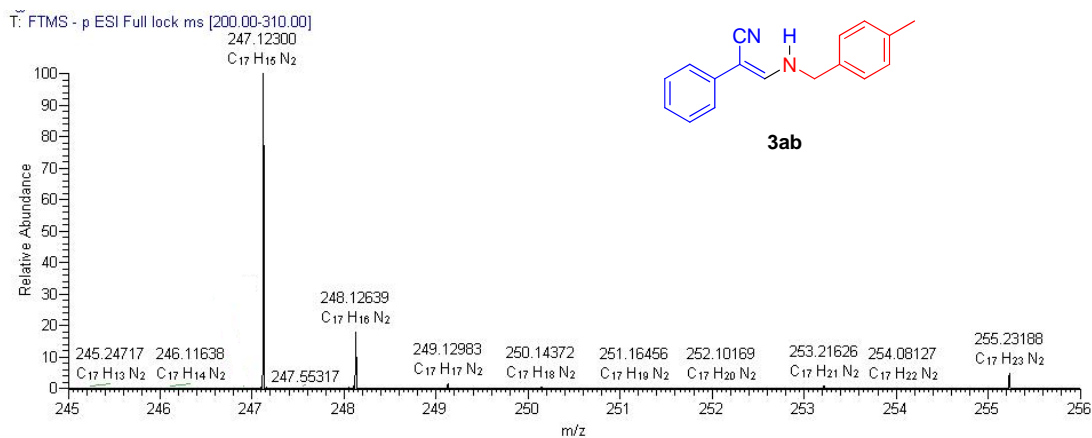

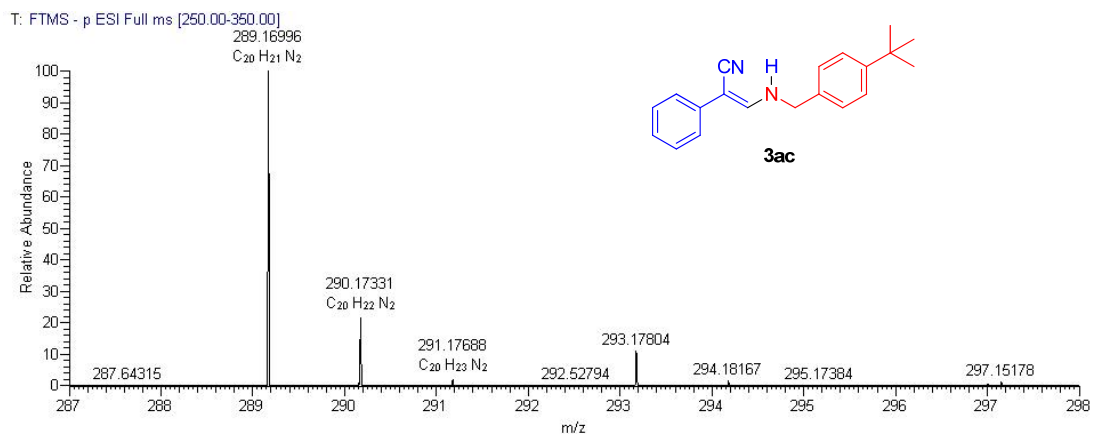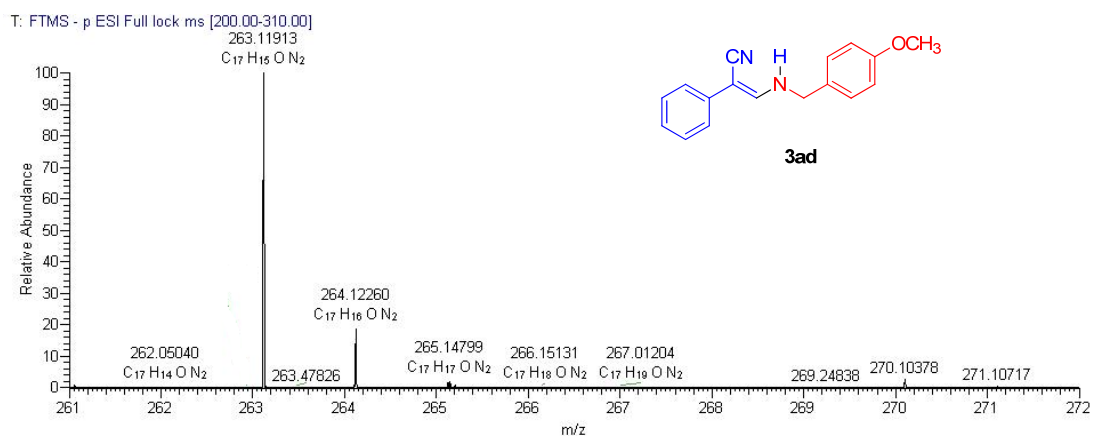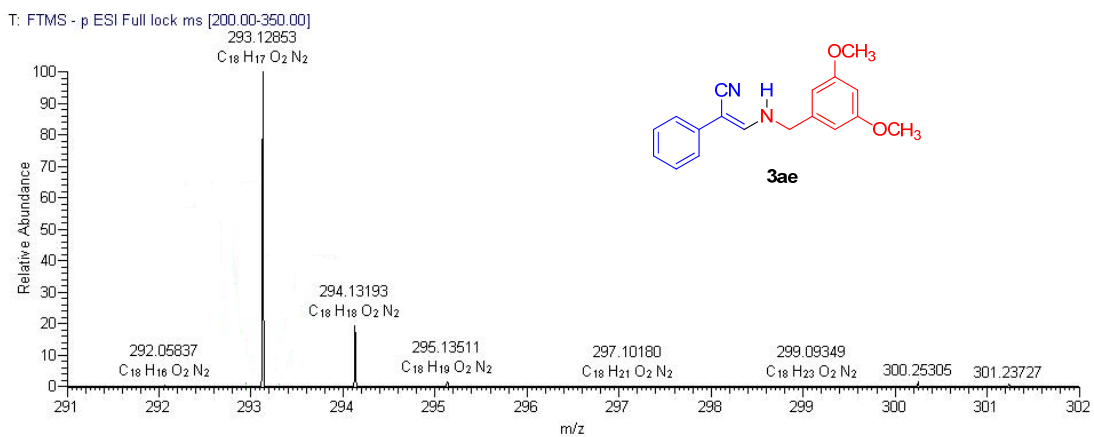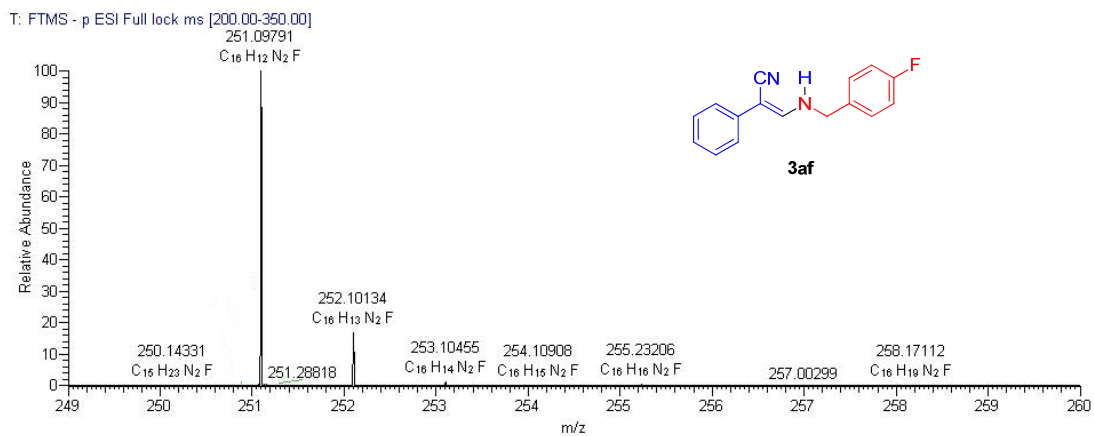



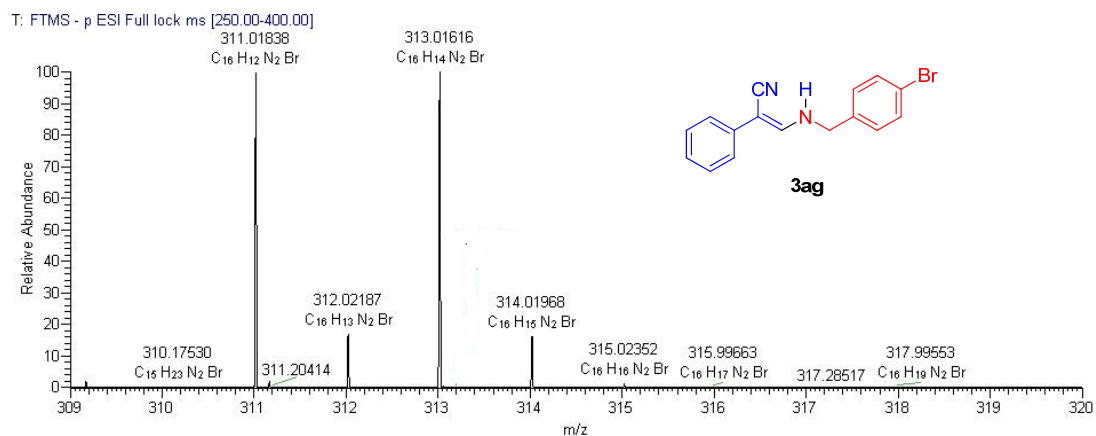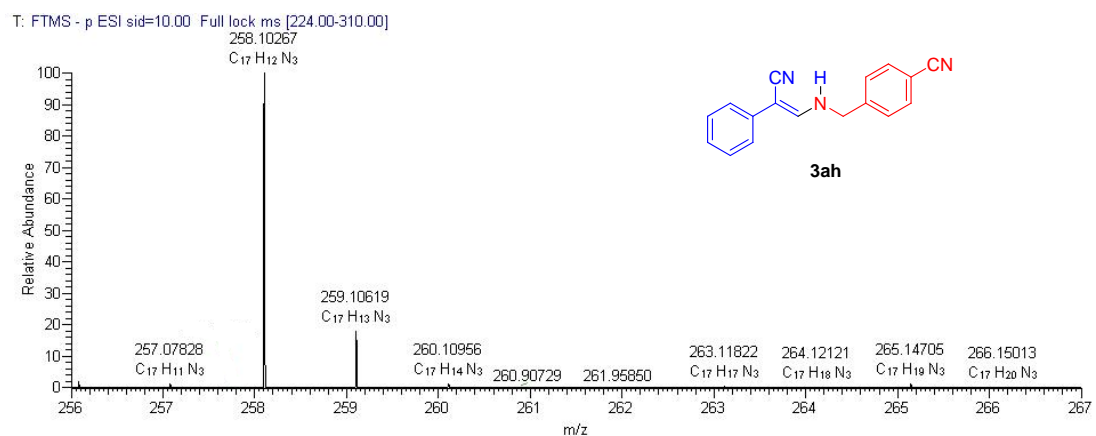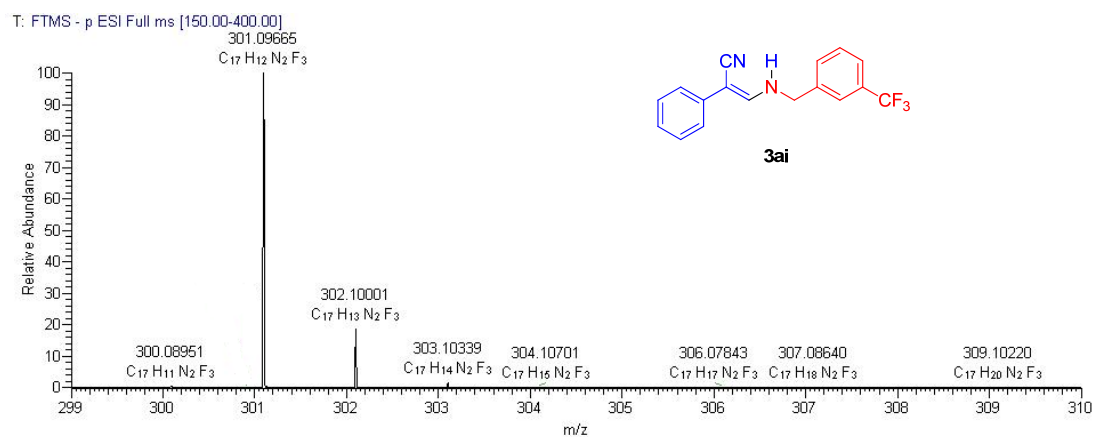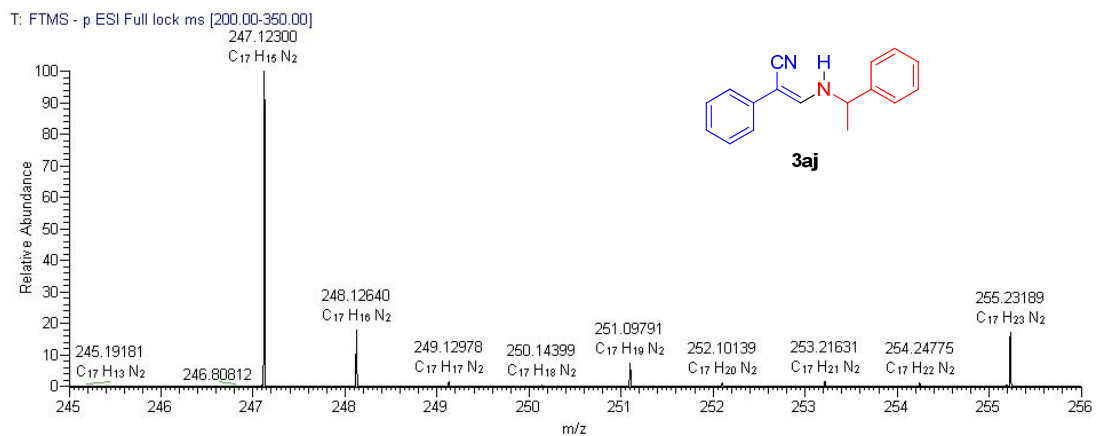

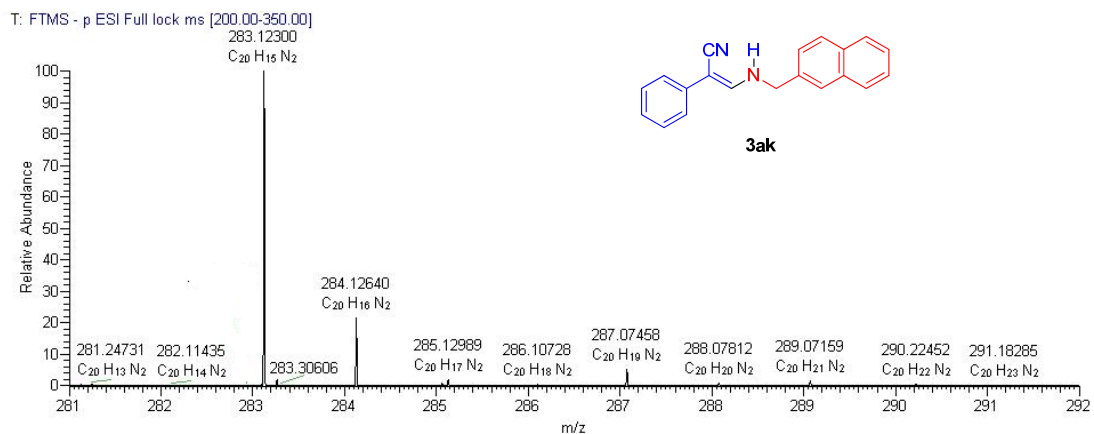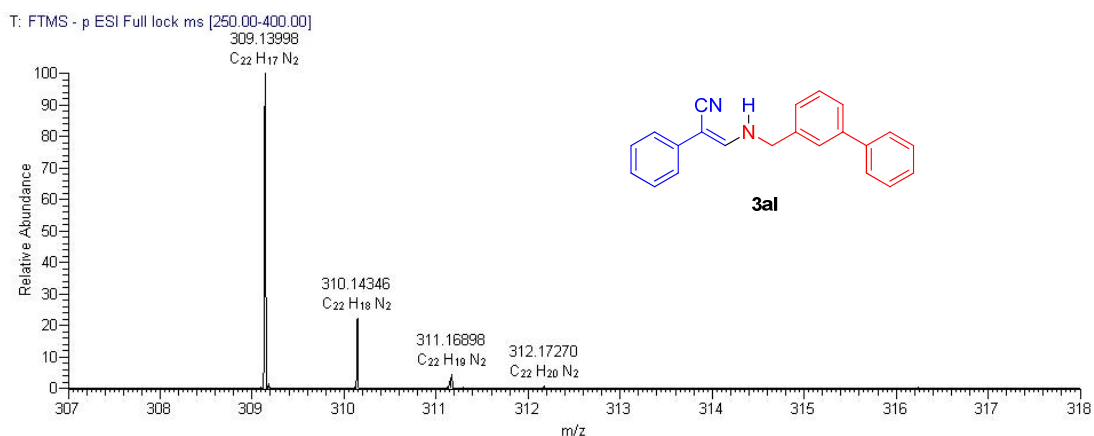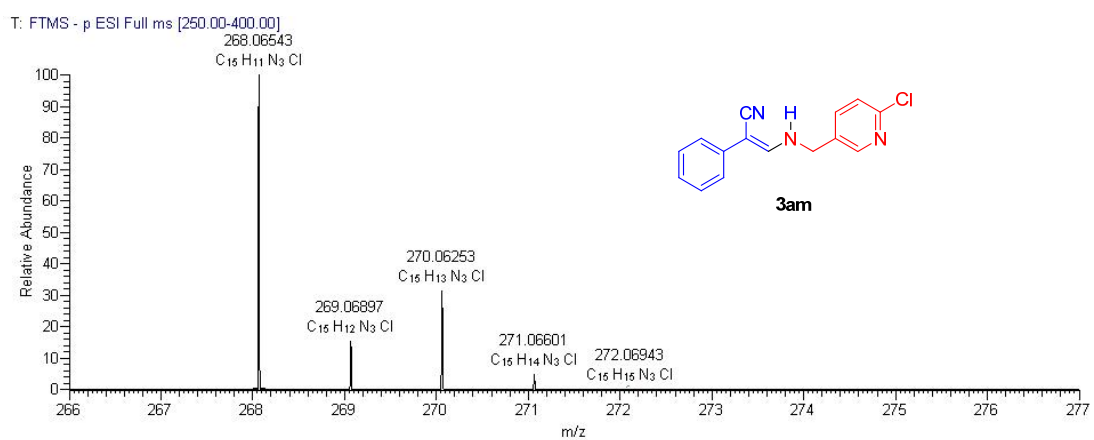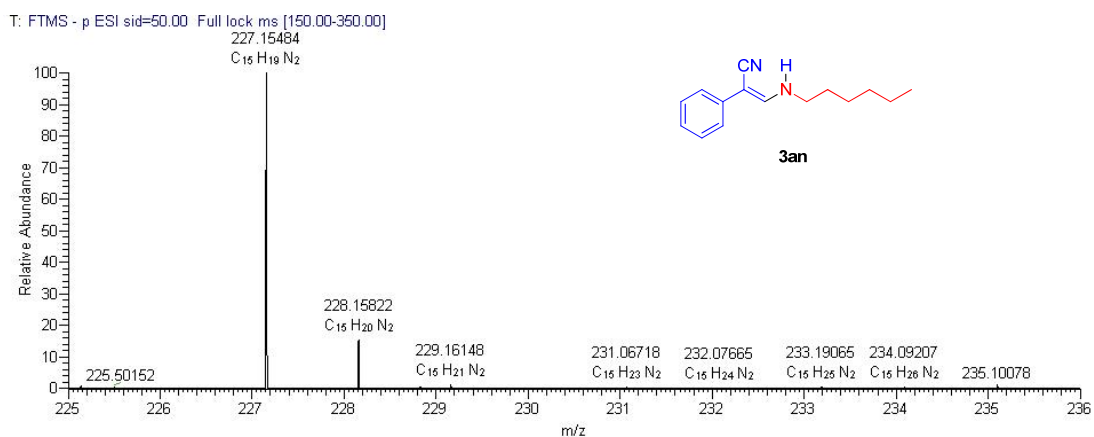

T: FTMS - p ESI sid=100.00 Full lock ms [150.00-400.00]

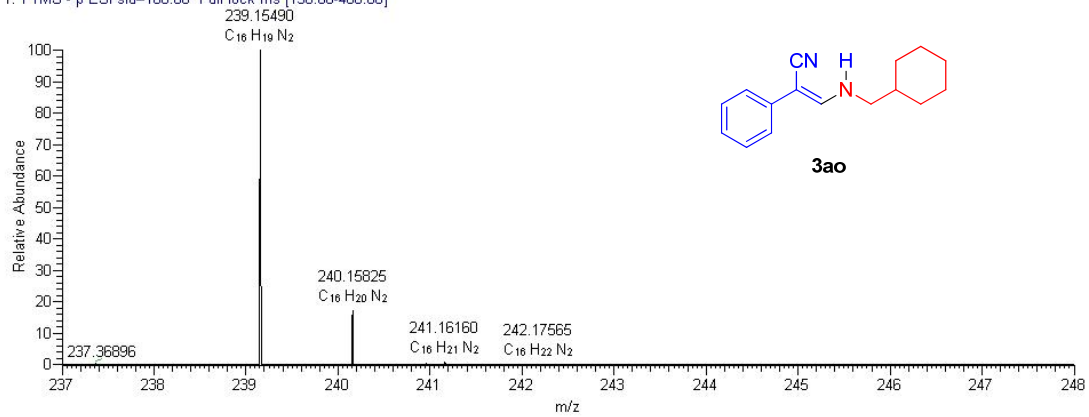

Supplement: c4ob01801j1.pdf [file c4ob01801j1.pdf]
